# Supplementary material for: A comprehensive benchmark investigation of quantum chemical methods for carbocations
Source: Royal Society of Chemistry journal article supplement (doi:10.1039/d2cp04603b), 2022-12-08
Supplement: d2cp04603b2.pdf [file d2cp04603b2.pdf]

## SUPPORTING INFORMATION

# A Comprehensive Benchmark Investigation of Quantum Chemical Methods for Carbocations

Marcelo T. de Oliveira\*<sup>1,2</sup>, Júlia M. A. Alves<sup>2</sup>, Natália Lussari Vrech<sup>3</sup>,  
Ataualpa A. C. Braga<sup>3</sup>, Cristina A. Barboza<sup>4,5</sup>

1 – Department of Chemistry and Physics, La Trobe Institute of Molecular Sciences,  
La Trobe University, Melbourne, Victoria 3086, Australia

2 – Chemistry Institute of São Carlos, University of São Paulo, Av. Trabalhador São Carlense 400,  
13566–590, São Carlos, SP, Brazil

3 – Instituto de Química, Universidade de São Paulo, Av. Prof. Lineu Prestes 748,  
05508–000, São Paulo, SP, Brazil

4 – Faculty of Chemistry, Wrocław University of Science and Technology, Wrocław, Poland

5 – Institute of Physics, Polish Academy of Sciences, Al. Lotników 32/46, Warsaw, Poland

*mtavareso@usp.br*

**Table 1.** Mean absolute deviation (MAD), standard deviation (SD) and maximum deviation (max) parameters (kcal mol<sup>-1</sup>) for CCSD(T) methods using various basis sets.

| Method                              | MAD  | SD   | max  |
|-------------------------------------|------|------|------|
| CCSD(T)/def2-TZVPP                  | 0.25 | 0.19 | 0.96 |
| CCSD(T)/def2-ma-TZVPP               | 0.21 | 0.18 | 0.90 |
| CCSD(T)/def2-QZVPP                  | 0.16 | 0.11 | 0.55 |
| CCSD(T)/def2-QZVPP(RIJCOSX)         | 0.15 | 0.11 | 0.58 |
| CCSD(T)/CBS(def2-Q/TZVPP) (RIJCOSX) | 0.12 | 0.10 | 0.42 |
| CCSD(T)/aug-cc-pVDZ                 | 0.54 | 0.55 | 2.81 |
| CCSD(T)/cc-pVTZ                     | 0.20 | 0.18 | 0.77 |
| CCSD(T)/aug-cc-pVTZ                 | 0.22 | 0.17 | 0.82 |
| CCSD(T)/aug-cc-pwCVTZ               | 0.19 | 0.14 | 0.68 |
| CCSD(T)/cc-pVQZ                     | 0.11 | 0.10 | 0.44 |
| CCSD(T)/cc-pVQZ(RIJCOSX)            | 0.11 | 0.09 | 0.45 |

**Table 2.** Percentage mean absolute relative error (%MARE), standard deviation (SD) and maximum deviation (max) parameters (%) for CCSD(T) methods using various basis sets.

| Method                              | %MARE | SD   | max   |
|-------------------------------------|-------|------|-------|
| CCSD(T)/def2-TZVPP                  | 1.75  | 1.35 | 4.57  |
| CCSD(T)/def2-ma-TZVPP               | 1.51  | 1.24 | 4.26  |
| CCSD(T)/def2-QZVPP                  | 1.07  | 0.76 | 2.69  |
| CCSD(T)/def2-QZVPP(RIJCOSX)         | 1.06  | 0.78 | 2.51  |
| CCSD(T)/CBS(def2-Q/TZVPP) (RIJCOSX) | 0.75  | 1.12 | 4.14  |
| CCSD(T)/aug-cc-pVDZ                 | 4.09  | 4.26 | 15.30 |
| CCSD(T)/cc-pVTZ                     | 1.28  | 1.24 | 3.98  |
| CCSD(T)/aug-cc-pVTZ                 | 1.57  | 1.27 | 4.42  |
| CCSD(T)/aug-cc-pwCVTZ               | 1.38  | 1.10 | 3.88  |
| CCSD(T)/cc-pVQZ                     | 0.78  | 0.76 | 2.72  |
| CCSD(T)/cc-pVQZ(RIJCOSX)            | 0.80  | 0.78 | 2.88  |

**Table 3.** Mean absolute deviation (MAD), standard deviation (SD) and maximum deviation (max) parameters (kcal mol<sup>-1</sup>) for CCSD(T) methods using various basis sets. Values are compared to W1-F12.

| Method                              | MAD  | SD   | max  |
|-------------------------------------|------|------|------|
| CCSD(T)/def2-TZVPP                  | 0.34 | 0.23 | 0.96 |
| CCSD(T)/ma-def2-TZVPP               | 0.32 | 0.22 | 0.90 |
| CCSD(T)/def2-QZVPP                  | 0.18 | 0.14 | 0.55 |
| CCSD(T)/def2-QZVPP(RIJCOSX)         | 0.19 | 0.15 | 0.58 |
| CCSD(T)/CBS(def2-Q/TZVPP) (RIJCOSX) | 0.12 | 0.12 | 0.42 |
| CCSD(T)/aug-cc-pVDZ                 | 0.57 | 0.38 | 1.47 |
| CCSD(T)/cc-pVTZ                     | 0.26 | 0.20 | 0.77 |
| CCSD(T)/aug-cc-pVTZ                 | 0.30 | 0.21 | 0.82 |
| CCSD(T)/aug-cc-pwCVTZ               | 0.27 | 0.17 | 0.68 |
| CCSD(T)/cc-pVQZ                     | 0.14 | 0.11 | 0.44 |
| CCSD(T)/cc-pVQZ(RIJCOSX)            | 0.13 | 0.12 | 0.45 |

**Table 4.** Mean absolute deviation (MAD), standard deviation (SD) and maximum deviation (max) parameters (kcal mol<sup>-1</sup>) comparing CCSD(T)/CBS and W1-F12.

| Method                            | MAD  | SD   | max  |
|-----------------------------------|------|------|------|
| CCSD(T)/CBS x W <sub>n</sub> -F12 | 0.10 | 0.08 | 0.30 |

**Table 5.** Percentage mean absolute relative error (%MARE), standard deviation (SD) and maximum deviation (max) parameters (%) comparing CCSD(T)/CBS and W1-F12.

| Method                            | %MARE | SD  | max |
|-----------------------------------|-------|-----|-----|
| CCSD(T)/CBS x W <sub>n</sub> -F12 | 0.8   | 0.6 | 2.2 |

**Table 6.** Mean absolute deviation (MAD), standard deviation (SD) and maximum deviation (max) parameters (kcal mol<sup>-1</sup>) for CBS-QB3 composite method.

| Method  | MAD  | SD   | max  |
|---------|------|------|------|
| CBS-QB3 | 1.58 | 1.02 | 3.50 |

**Table 7.** Percentage mean absolute relative error (%MARE), standard deviation (SD) and maximum deviation (max) parameters (%) for CBS-QB3 composite method.

| Method  | %MARE | SD   | max   |
|---------|-------|------|-------|
| CBS-QB3 | 10.83 | 8.79 | 27.60 |

**Table 8.** Mean absolute deviation (MAD), standard deviation (SD) and maximum deviation (max) parameters (kcal mol<sup>-1</sup>) for all 75 dispersion-uncorrected DFAs.

| #  | DFA               | MAD  | SD   | max   | #  | DFA                  | MAD  | SD   | max  |
|----|-------------------|------|------|-------|----|----------------------|------|------|------|
| 1  | SVWN5             | 2.31 | 1.73 | 7.43  | 39 | PBE0                 | 0.86 | 0.67 | 2.72 |
| 2  | Xalpha            | 1.72 | 1.32 | 5.09  | 40 | SOGGA11X             | 0.95 | 0.70 | 2.54 |
| 3  | BLYP              | 5.94 | 3.84 | 11.35 | 41 | $\omega$ B97X        | 1.31 | 0.89 | 3.46 |
| 4  | HCTH/407          | 2.38 | 1.67 | 5.96  | 42 | X3LYP                | 4.66 | 2.73 | 8.54 |
| 5  | N12               | 1.21 | 0.74 | 3.14  | 43 | BMK                  | 1.33 | 1.32 | 4.68 |
| 6  | PBE               | 1.39 | 0.90 | 3.22  | 44 | M05                  | 2.33 | 1.82 | 6.49 |
| 7  | RPBE              | 2.27 | 1.30 | 4.77  | 45 | M06                  | 2.12 | 1.47 | 5.36 |
| 8  | revPBE            | 2.05 | 1.17 | 4.31  | 46 | M06-2X               | 1.04 | 0.86 | 3.15 |
| 9  | rPW86PBE          | 4.42 | 2.81 | 8.95  | 47 | M08-HX               | 1.07 | 0.71 | 3.00 |
| 10 | XLYP              | 6.47 | 4.22 | 12.43 | 48 | MN15                 | 0.77 | 0.57 | 2.77 |
| 11 | M06-L             | 3.00 | 2.36 | 10.66 | 49 | PW6B95               | 1.06 | 0.63 | 2.50 |
| 12 | M11-L             | 4.85 | 2.49 | 8.84  | 50 | revPBE0              | 0.96 | 0.66 | 2.59 |
| 13 | MN12-L            | 3.27 | 1.37 | 5.19  | 51 | revTPSS0             | 1.30 | 0.86 | 3.35 |
| 14 | MN15-L            | 1.51 | 0.84 | 3.30  | 52 | revTPSSh             | 1.02 | 0.81 | 2.67 |
| 15 | PKZB              | 0.92 | 0.72 | 2.65  | 53 | SCAN0                | 1.09 | 0.63 | 2.62 |
| 16 | revTPSS           | 1.23 | 0.86 | 2.98  | 54 | TPSS0                | 0.65 | 0.52 | 2.22 |
| 17 | RSCAN             | 2.46 | 1.03 | 4.45  | 55 | TPSSh                | 0.99 | 0.65 | 2.36 |
| 18 | R2SCAN            | 2.35 | 0.98 | 4.14  | 56 | $\tau$ HCTHhyb       | 2.59 | 1.30 | 4.89 |
| 19 | SCAN              | 1.85 | 0.67 | 3.06  | 57 | B2CN-PLYP            | 2.03 | 1.37 | 4.65 |
| 20 | TPSS              | 1.38 | 0.93 | 3.15  | 58 | B2GP-PLYP            | 2.01 | 1.21 | 3.73 |
| 21 | $\tau$ HCTH       | 2.95 | 1.76 | 6.36  | 59 | B2PLYP               | 2.76 | 1.72 | 5.27 |
| 22 | APFD              | 0.81 | 0.61 | 2.63  | 60 | DOD-SCAN             | 3.36 | 2.32 | 7.15 |
| 23 | B1B95             | 0.81 | 0.76 | 2.93  | 61 | DSD-PBEB95           | 0.89 | 0.67 | 2.37 |
| 24 | B3LYP             | 4.74 | 2.81 | 8.73  | 62 | DSD-PBEP86           | 0.36 | 0.30 | 1.08 |
| 25 | B97               | 2.64 | 1.36 | 5.19  | 63 | LS1DH-PBE            | 1.59 | 1.36 | 4.26 |
| 26 | B98               | 3.10 | 1.70 | 6.45  | 64 | mPW2PLYP             | 2.83 | 1.67 | 5.28 |
| 27 | BB1K              | 1.35 | 0.95 | 3.39  | 65 | PBE0-2               | 1.72 | 1.36 | 4.29 |
| 28 | BHandHLYP         | 4.44 | 2.33 | 7.81  | 66 | PBE0DH               | 1.20 | 0.64 | 2.29 |
| 29 | CAMB3LYP          | 3.33 | 1.60 | 5.57  | 67 | PBEQIDH              | 1.95 | 1.27 | 4.41 |
| 30 | HSE06             | 1.01 | 0.67 | 2.74  | 68 | PWPB95               | 0.40 | 0.38 | 1.39 |
| 31 | LC- $\omega$ HPBE | 3.30 | 2.55 | 10.27 | 69 | revDOD-PBEP86        | 0.78 | 0.46 | 1.73 |
| 32 | LC-PBE            | 3.77 | 3.73 | 12.14 | 70 | revDSD-PBEP86        | 0.73 | 0.45 | 1.74 |
| 33 | MN12SX            | 1.84 | 0.87 | 3.30  | 71 | RSX-0DH              | 3.24 | 2.84 | 8.98 |
| 34 | mPW1B95           | 0.85 | 0.68 | 2.61  | 72 | RSX-QIDH             | 2.65 | 2.31 | 7.09 |
| 35 | mPW1PW91          | 1.01 | 0.67 | 2.67  | 73 | $\omega$ B97M-2      | 0.63 | 0.45 | 1.66 |
| 36 | mPWB1K            | 1.36 | 1.29 | 5.70  | 74 | $\omega$ B97X-2(TQZ) | 0.38 | 0.31 | 1.20 |
| 37 | N12SX             | 1.01 | 0.68 | 2.73  | 75 | SOS0-PBE2-0          | 1.70 | 1.10 | 4.02 |
| 38 | O3LYP             | 1.05 | 0.79 | 3.31  |    |                      |      |      |      |

**Table 9.** Mean deviation (MD) for all 75 dispersion-uncorrected DFAs (kcal mol<sup>-1</sup>).

| #  | DFA               | MD    | #  | DFA                  | MD    |
|----|-------------------|-------|----|----------------------|-------|
| 1  | SVWN5             | 1.02  | 39 | PBE0                 | -0.27 |
| 2  | Xalpha            | 0.07  | 40 | SOGGA11X             | -0.71 |
| 3  | BLYP              | -5.54 | 41 | $\omega$ B97X        | -0.86 |
| 4  | HCTH/407          | -2.10 | 42 | X3LYP                | -4.43 |
| 5  | N12               | -0.93 | 43 | BMK                  | 0.50  |
| 6  | PBE               | -1.14 | 44 | M05                  | 0.62  |
| 7  | RPBE              | -1.96 | 45 | M06                  | -1.83 |
| 8  | revPBE            | -1.74 | 46 | M06-2X               | 0.29  |
| 9  | rPW86PBE          | -4.14 | 47 | M08-HX               | -0.35 |
| 10 | XLYP              | -6.03 | 48 | MN15                 | -0.21 |
| 11 | M06-L             | -1.22 | 49 | PW6B95               | -0.95 |
| 12 | M11-L             | -4.48 | 50 | revPBE0              | -0.71 |
| 13 | MN12-L            | -3.03 | 51 | revTPSS0             | 0.72  |
| 14 | MN15-L            | -1.22 | 52 | revTPSSh             | 0.43  |
| 15 | PKZB              | -0.55 | 53 | SCAN0                | 0.90  |
| 16 | revTPSS           | 0.71  | 54 | TPSS0                | -0.26 |
| 17 | RSCAN             | -2.20 | 55 | TPSSh                | -0.72 |
| 18 | R2SCAN            | -1.72 | 56 | $\tau$ HCTHhyb       | -2.37 |
| 19 | SCAN              | -1.06 | 57 | B2CN-PLYP            | 1.87  |
| 20 | TPSS              | -2.66 | 58 | B2GP-PLYP            | -1.91 |
| 21 | $\tau$ HCTH       | -0.33 | 59 | B2PLYP               | -2.62 |
| 22 | APFD              | 0.11  | 60 | DOD-SCAN             | -3.09 |
| 23 | B1B95             | -4.49 | 61 | DSD-PBEB95           | 0.68  |
| 24 | B3LYP             | -1.35 | 62 | DSD-PBEP86           | 0.04  |
| 25 | B97               | -2.86 | 63 | revDSD-PBEP86        | -0.64 |
| 26 | B98               | -1.02 | 64 | RSX-0DH              | 2.46  |
| 27 | BB1K              | -4.23 | 65 | RSX-QIDH             | 2.13  |
| 28 | BHandHLYP         | -3.17 | 66 | $\omega$ B97M-2      | -0.56 |
| 29 | CAMB3LYP          | -0.81 | 67 | $\omega$ B97X-2(TQZ) | -0.12 |
| 30 | HSE06             | 2.46  | 68 | SOS0-PBE2-0          | -1.35 |
| 31 | LC- $\omega$ HPBE | 2.77  | 69 | revDOD-PBEP86        | -0.67 |
| 32 | LC-PBE            | -1.60 | 70 | revDSD-PBEP86        | -0.64 |
| 33 | MN12SX            | 0.16  | 71 | RSX-0DH              | 2.46  |
| 34 | mPW1B95           | -4.78 | 72 | RSX-QIDH             | 2.13  |
| 35 | mPW1PW91          | -0.82 | 73 | $\omega$ B97M-2      | -0.56 |
| 36 | mPWB1K            | 0.68  | 74 | $\omega$ B97X-2(TQZ) | -0.12 |
| 37 | N12SX             | -0.20 | 75 | SOS0-PBE2-0          | -1.35 |
| 38 | O3LYP             | -0.45 |    |                      |       |

**Table 10.** Percentage mean absolute relative error (%MARE), standard deviation (SD) and maximum deviation (max) parameters (%) for all 75 dispersion-uncorrected DFAs (%).

| #  | DFA               | %MARE | SD   | max   | #  | DFA                  | %MARE | SD   | max   |
|----|-------------------|-------|------|-------|----|----------------------|-------|------|-------|
| 1  | SVWN5             | 14.6  | 9.9  | 41.3  | 39 | PBE0                 | 6.6   | 7.0  | 27.1  |
| 2  | Xalpha            | 11.1  | 10.0 | 41.0  | 40 | SOGGA11X             | 6.8   | 6.3  | 28.3  |
| 3  | BLYP              | 40.3  | 33.8 | 146.2 | 41 | $\omega$ B97X        | 9.7   | 8.2  | 35.6  |
| 4  | HCTH/407          | 16.4  | 14.0 | 55.3  | 42 | X3LYP                | 31.6  | 25.4 | 104.3 |
| 5  | N12               | 10.2  | 10.0 | 39.4  | 43 | BMK                  | 9.8   | 9.4  | 30.9  |
| 6  | PBE               | 11.2  | 9.7  | 34.9  | 44 | M05                  | 15.8  | 17.4 | 85.2  |
| 7  | RPBE              | 16.8  | 13.4 | 47.3  | 45 | M06                  | 14.2  | 10.7 | 45.6  |
| 8  | revPBE            | 15.4  | 12.4 | 41.9  | 46 | M06-2X               | 7.8   | 8.3  | 35.7  |
| 9  | rPW86PBE          | 29.8  | 24.9 | 99.1  | 47 | M08-HX               | 8.5   | 7.3  | 26.5  |
| 10 | XLYP              | 43.7  | 36.6 | 159.5 | 48 | MN15                 | 5.3   | 4.6  | 20.4  |
| 11 | M06-L             | 19.4  | 14.1 | 56.5  | 49 | PW6B95               | 7.6   | 5.6  | 24.8  |
| 12 | M11-L             | 37.1  | 30.8 | 143.7 | 50 | revPBE0              | 7.5   | 7.5  | 30.7  |
| 13 | MN12-L            | 24.4  | 16.9 | 78.1  | 51 | revTPSS0             | 9.0   | 6.9  | 31.9  |
| 14 | MN15-L            | 11.2  | 9.3  | 47.1  | 52 | revTPSSh             | 7.2   | 6.7  | 21.1  |
| 15 | PKZB              | 6.6   | 6.8  | 26.4  | 53 | SCAN0                | 8.3   | 6.9  | 26.0  |
| 16 | revTPSS           | 9.0   | 7.6  | 27.1  | 54 | TPSSh                | 7.1   | 6.4  | 25.7  |
| 17 | RSCAN             | 17.7  | 10.2 | 34.2  | 55 | TPSS0                | 4.6   | 5.1  | 22.1  |
| 18 | R2SCAN            | 16.9  | 9.9  | 30.3  | 56 | $\tau$ HCTHhyb       | 18.6  | 14.4 | 57.9  |
| 19 | SCAN              | 14.1  | 8.8  | 45.0  | 57 | B2CN-PLYP            | 15.3  | 14.5 | 56.8  |
| 20 | TPSS              | 10.0  | 8.6  | 30.3  | 58 | B2GP-PLYP            | 12.9  | 8.9  | 39.0  |
| 21 | $\tau$ HCTH       | 20.8  | 16.2 | 55.1  | 59 | B2PLYP               | 18.1  | 13.9 | 60.4  |
| 22 | APFD              | 6.3   | 7.0  | 107.0 | 60 | DOD-SCAN             | 22.1  | 19.2 | 71.2  |
| 23 | B1B95             | 5.7   | 6.1  | 37.0  | 61 | DSD-PBEB95           | 6.2   | 5.8  | 28.5  |
| 24 | B3LYP             | 32.1  | 25.1 | 62.0  | 62 | DSD-PBEP86           | 2.3   | 2.4  | 10.6  |
| 25 | B97               | 19.1  | 15.3 | 32.3  | 63 | LS1DH-PBE            | 10.9  | 11.0 | 51.8  |
| 25 | B98               | 22.2  | 18.5 | 86.6  | 64 | mPW2PLYP             | 18.6  | 13.6 | 59.5  |
| 27 | BB1K              | 10.2  | 8.9  | 61.7  | 65 | PBE0-2               | 12.0  | 11.4 | 54.6  |
| 28 | BHandHLYP         | 30.0  | 21.0 | 31.7  | 66 | PBE0-DH              | 9.0   | 7.4  | 34.3  |
| 29 | CAMB3LYP          | 23.3  | 16.1 | 80.8  | 67 | PBE-QIDH             | 14.1  | 11.7 | 53.9  |
| 30 | HSE06             | 7.9   | 7.6  | 129.6 | 68 | PWPB95               | 2.6   | 2.8  | 13.8  |
| 31 | LC- $\omega$ HPBE | 20.8  | 16.7 | 53.8  | 69 | revDOD-PBEP86        | 5.3   | 3.8  | 15.9  |
| 32 | LC-PBE            | 25.7  | 27.8 | 25.9  | 70 | revDSD-PBEP86        | 4.8   | 3.4  | 13.7  |
| 33 | MN12SX            | 14.5  | 11.3 | 112.8 | 71 | RSX-0DH              | 21.4  | 21.2 | 98.1  |
| 34 | mPW1B95           | 6.3   | 6.4  | 34.2  | 72 | RSX-QIDH             | 17.5  | 17.8 | 81.9  |
| 35 | mPW1PW91          | 8.1   | 7.7  | 31.3  | 73 | $\omega$ B97M-2      | 4.6   | 3.6  | 14.8  |
| 36 | mPWB1K            | 9.3   | 8.8  | 42.2  | 74 | $\omega$ B97X-2(TQZ) | 2.4   | 2.3  | 9.1   |
| 37 | N12SX             | 7.9   | 7.5  | 28.9  | 75 | SOS0-PBE2-0          | 11.8  | 9.0  | 33.6  |
| 38 | O3LYP             | 8.1   | 8.5  | 35.5  |    |                      |       |      |       |

**Table 11.** Mean absolute deviation (MAD), standard deviation (SD) and maximum deviation (max) parameters (kcal mol<sup>-1</sup>) for dispersion-corrected DFAs.

| Method                                  | MAD  | SD   | max  |
|-----------------------------------------|------|------|------|
| <b>N12-D3</b>                           | 1.04 | 0.80 | 2.89 |
| <b>PBE-D3(BJ)</b>                       | 1.36 | 0.85 | 2.99 |
| <b>PBE-D4</b>                           | 1.37 | 0.87 | 3.01 |
| <b>PBE-NL</b>                           | 0.96 | 0.68 | 3.00 |
| <b>B97M-D3(BJ)</b>                      | 4.51 | 1.88 | 6.94 |
| <b>B97M-D4</b>                          | 4.53 | 2.02 | 7.23 |
| <b>B97M-V</b>                           | 3.88 | 1.64 | 6.45 |
| <b>PKZB-D3</b>                          | 0.90 | 0.51 | 2.24 |
| <b>revTPSS-D3(BJ)</b>                   | 1.25 | 0.95 | 3.46 |
| <b>revTPSS-D4</b>                       | 1.22 | 0.93 | 3.29 |
| <b>revTPSS-NL</b>                       | 2.02 | 1.36 | 5.22 |
| <b>MN15-D3(BJ)</b>                      | 0.77 | 0.58 | 2.77 |
| <b><math>\omega</math>B97X-D3(BJ)</b>   | 1.12 | 0.77 | 2.39 |
| <b><math>\omega</math>B97X-D4</b>       | 1.31 | 0.89 | 3.47 |
| <b><math>\omega</math>B97X-V</b>        | 1.15 | 0.58 | 2.05 |
| <b><math>\omega</math>B97M-D3(BJ)</b>   | 1.62 | 0.75 | 2.98 |
| <b><math>\omega</math>B97M-D4</b>       | 1.67 | 0.79 | 3.26 |
| <b><math>\omega</math>B97M-V</b>        | 1.07 | 0.75 | 2.59 |
| <b>TPSS0-D3(BJ)</b>                     | 0.67 | 0.56 | 2.13 |
| <b>TPSS0-D4</b>                         | 0.73 | 0.54 | 1.97 |
| <b>TPSS0-NL</b>                         | 1.02 | 0.93 | 3.80 |
| <b>DSD-PBEP86-D3(BJ)</b>                | 0.34 | 0.30 | 1.23 |
| <b>DSD-PBEP86-D4</b>                    | 0.38 | 0.35 | 1.39 |
| <b>DSD-PBEP86-NL</b>                    | 0.24 | 0.30 | 1.20 |
| <b>PWPB95-D3(BJ)</b>                    | 0.41 | 0.36 | 1.30 |
| <b>PWPB95-D4</b>                        | 0.36 | 0.34 | 1.27 |
| <b>PWPB95-NL</b>                        | 0.35 | 0.38 | 1.43 |
| <b><math>\omega</math>B97X-2-D3(BJ)</b> | 0.37 | 0.35 | 1.30 |

**Table 12.** Mean deviation (MD) for dispersion-corrected DFAs (kcal mol<sup>-1</sup>).

| <b>Method</b>                           | <b>MD</b> |
|-----------------------------------------|-----------|
| <b>N12-D3</b>                           | 0.76      |
| <b>PBE-D3(BJ)</b>                       | -1.13     |
| <b>PBE-D4</b>                           | -1.15     |
| <b>PBE-NL</b>                           | -0.52     |
| <b>B97M-D3(BJ)</b>                      | 4.28      |
| <b>B97M-D4</b>                          | 4.30      |
| <b>B97M-V</b>                           | 3.68      |
| <b>PKZB-D3</b>                          | 0.21      |
| <b>revTPSS-D3(BJ)</b>                   | 0.72      |
| <b>revTPSS-D4</b>                       | 0.71      |
| <b>revTPSS-NL</b>                       | 1.56      |
| <b>MN15-D3(BJ)</b>                      | 0.18      |
| <b><math>\omega</math>B97X-D3(BJ)</b>   | -0.90     |
| <b><math>\omega</math>B97X-D4</b>       | -0.88     |
| <b><math>\omega</math>B97X-V</b>        | -0.25     |
| <b><math>\omega</math>B97M-D3(BJ)</b>   | -1.51     |
| <b><math>\omega</math>B97M-D4</b>       | -1.55     |
| <b><math>\omega</math>B97M-V</b>        | -0.93     |
| <b>TPSS0-D3(BJ)</b>                     | -0.18     |
| <b>TPSS0-D4</b>                         | -0.19     |
| <b>TPSS0-NL</b>                         | 0.40      |
| <b>DSD-PBEP86-D3(BJ)</b>                | -0.26     |
| <b>DSD-PBEP86-D4</b>                    | -0.28     |
| <b>DSD-PBEP86-NL</b>                    | -0.16     |
| <b>PWPB95-D3(BJ)</b>                    | -0.30     |
| <b>PWPB95-D4</b>                        | -0.20     |
| <b>PWPB95-NL</b>                        | -0.05     |
| <b><math>\omega</math>B97X-2-D3(BJ)</b> | -0.27     |



**Table 13.** Percentage mean absolute relative error (%MARE), standard deviation (SD) and maximum deviation (max) parameters for dispersion-corrected DFAs (%).

| Method                 | %MARE | SD   | max  |
|------------------------|-------|------|------|
| N12-D3                 | 10.1  | 8.0  | 41.5 |
| PBE-D3(BJ)             | 10.8  | 9.5  | 33.5 |
| PBE-D4                 | 11.1  | 9.5  | 34.4 |
| PBE-NL                 | 7.7   | 7.7  | 29.8 |
| B97M-D3(BJ)            | 30.6  | 17.3 | 77.7 |
| B97M-D4                | 30.6  | 17.8 | 80.1 |
| B97M-V                 | 26.4  | 15.0 | 73.4 |
| PKZB-D3                | 6.8   | 4.7  | 24.4 |
| revTPSS-D3(BJ)         | 9.1   | 7.7  | 29.4 |
| revTPSS-D4             | 8.9   | 7.5  | 28.4 |
| revTPSS-NL             | 14.0  | 10.9 | 40.3 |
| MN15-D3(BJ)            | 5.3   | 3.9  | 20.4 |
| $\omega$ B97X-D3(BJ)   | 9.2   | 8.4  | 34.0 |
| $\omega$ B97X-D4       | 10.0  | 8.2  | 35.7 |
| $\omega$ B97X-V        | 8.4   | 7.0  | 28.5 |
| $\omega$ B97M-D3(BJ)   | 11.5  | 8.1  | 30.1 |
| $\omega$ B97M-D4       | 11.9  | 8.2  | 32.0 |
| $\omega$ B97M-V        | 8.4   | 7.1  | 25.4 |
| TPSS0-D3(BJ)           | 5.0   | 5.5  | 22.3 |
| TPSS0-D4               | 5.3   | 5.4  | 21.3 |
| TPSS0-NL               | 7.0   | 6.7  | 26.7 |
| DSD-PBEP86-D3(BJ)      | 2.2   | 2.6  | 12.2 |
| DSD-PBEP86-D4          | 2.4   | 2.9  | 13.8 |
| DSD-PBEP86-NL          | 1.7   | 2.7  | 11.9 |
| PWPB95-D3(BJ)          | 2.8   | 2.7  | 12.9 |
| PWPB95-D4              | 2.4   | 2.6  | 12.6 |
| PWPB95-NL              | 2.3   | 2.7  | 12.8 |
| $\omega$ B97X-2-D3(BJ) | 2.2   | 2.0  | 8.0  |

**Table 14.** Mean absolute deviation (MAD), standard deviation (SD) and maximum deviation (max) parameters (kcal mol<sup>-1</sup>) for RI-MP2-D3(BJ) and RI-SCS-MP2-D3(BJ) using aug-cc-pVQZ basis set.

| Method         | MAD  | SD   | max  |
|----------------|------|------|------|
| RI-MP2-D3(BJ)  | 2.92 | 1.79 | 5.44 |
| SCS-MP2-D3(BJ) | 1.72 | 1.08 | 3.88 |

**Table 15.** Percentage mean absolute relative error (%MARE), standard deviation (SD) and maximum deviation (max) parameters (%) for RI-MP2-D3(BJ) and RI-SCS-MP2-D3(BJ) using aug-cc-pVQZ basis set.

| Method         | %MARE | SD   | max  |
|----------------|-------|------|------|
| RI-MP2-D3(BJ)  | 20.6  | 17.8 | 65.2 |
| SCS-MP2-D3(BJ) | 11.7  | 9.7  | 42.1 |

**Table 16.** Mean absolute deviation (MAD), standard deviation (SD) and maximum deviation (max) parameters (kcal mol<sup>-1</sup>) for 3-fold corrected (3c) composite methods.

| Method                 | MAD   | SD   | max   |
|------------------------|-------|------|-------|
| HF-3c                  | 16.06 | 9.85 | 33.06 |
| B97-3c                 | 4.12  | 1.99 | 6.49  |
| PBEh-3c                | 2.06  | 1.48 | 4.85  |
| r <sup>2</sup> SCAN-3c | 2.76  | 1.00 | 4.73  |

**Table 17.** Percentage mean absolute relative error (%MARE), standard deviation (SD) and maximum deviation (max) parameters (%) for 3-fold corrected (3c) composite methods.

| Method                 | %MARE | SD    | max   |
|------------------------|-------|-------|-------|
| HF-3c                  | 110.6 | 105.1 | 386.6 |
| B97-3c                 | 26.9  | 19.9  | 73.5  |
| PBEh-3c                | 13.7  | 10.9  | 49.2  |
| r <sup>2</sup> SCAN-3c | 19.9  | 14.9  | 67.9  |

**Table 18.** Mean absolute deviation (MAD), standard deviation (SD) and maximum deviation (max) parameters (kcal mol<sup>-1</sup>) for TPSS0 density functional using various basis sets.

| <b>Basis Set</b>         | <b>MAD</b> | <b>SD</b> | <b>max</b> |
|--------------------------|------------|-----------|------------|
| <b>6-31G(d)</b>          | 1.50       | 1.43      | 5.33       |
| <b>6-31+G(d,p)</b>       | 1.05       | 1.00      | 4.04       |
| <b>6-311++G(2d,p)</b>    | 0.81       | 0.60      | 2.44       |
| <b>6-311++G(3df,3pd)</b> | 0.70       | 0.62      | 2.32       |
| <b>cc-pVDZ</b>           | 0.95       | 0.77      | 3.20       |
| <b>cc-pVTZ</b>           | 0.68       | 0.56      | 2.26       |
| <b>cc-pVQZ</b>           | 0.65       | 0.56      | 2.21       |
| <b>aug-cc-pVDZ</b>       | 0.97       | 0.88      | 3.41       |
| <b>aug-cc-pVTZ</b>       | 0.66       | 0.55      | 2.21       |
| <b>aug-cc-pVQZ</b>       | 0.65       | 0.56      | 2.20       |
| <b>def2-mSVP</b>         | 1.58       | 1.44      | 5.49       |
| <b>def2-SVP</b>          | 1.10       | 0.78      | 2.69       |
| <b>def2-TZVP</b>         | 0.74       | 0.58      | 2.25       |
| <b>def2-TZVPPD</b>       | 0.73       | 0.56      | 2.21       |
| <b>def2-QZVPP</b>        | 0.70       | 0.54      | 2.22       |
| <b>ma-def2-TZVP</b>      | 0.74       | 0.58      | 2.24       |
| <b>ma-def2-QZVPP</b>     | 0.66       | 0.55      | 2.22       |
| <b>pcSeg-0</b>           | 11.12      | 7.05      | 23.35      |
| <b>pcSeg-1</b>           | 2.16       | 1.24      | 4.22       |
| <b>aug-pcSeg-1</b>       | 1.00       | 0.71      | 2.41       |
| <b>pcSeg-2</b>           | 0.73       | 0.58      | 2.28       |
| <b>aug-pcSeg-2</b>       | 0.72       | 0.56      | 2.23       |
| <b>pcSeg-3</b>           | 0.71       | 0.57      | 2.22       |

**Table 19.** Percentage mean absolute relative error (%MARE), standard deviation (SD) and maximum deviation (max) parameters (%) for TPSS0 density functional using various basis sets.

| Basis Set         | %MARE | SD   | max   |
|-------------------|-------|------|-------|
| 6-31G(d)          | 9.8   | 9.6  | 40.0  |
| 6-31+G(d,p)       | 7.0   | 7.3  | 29.4  |
| 6-311++G(2d,p)    | 6.1   | 6.2  | 25.2  |
| 6-311++G(3df,3pd) | 4.9   | 5.2  | 21.3  |
| cc-pVDZ           | 7.2   | 8q.2 | 33.8  |
| cc-pVTZ           | 4.9   | 5.3  | 22.4  |
| cc-pVQZ           | 4.6   | 5.1  | 21.9  |
| aug-cc-pVDZ       | 6.6   | 6.4  | 21.3  |
| aug-cc-pVTZ       | 4.7   | 5.1  | 21.9  |
| aug-cc-pVQZ       | 4.6   | 5.1  | 21.9  |
| def2-mSVP         | 10.7  | 10.3 | 37.5  |
| def2-SVP          | 8.2   | 9.2  | 43.8  |
| def2-TZVP         | 5.5   | 5.7  | 22.4  |
| def2-TZVPPD       | 5.4   | 5.6  | 21.9  |
| def2-QZVPP        | 4.6   | 5.2  | 22.0  |
| ma-def2-TZVP      | 5.5   | 5.7  | 22.3  |
| ma-def2-QZVPP     | 4.7   | 5.1  | 22.0  |
| pcSeg-0           | 79.0  | 73.9 | 277.2 |
| pcSeg-1           | 15.4  | 12.9 | 59.5  |
| aug-pcSeg-1       | 7.9   | 8.6  | 35.9  |
| pcSeg-2           | 5.4   | 5.7  | 22.6  |
| aug-pcSeg-2       | 5.3   | 5.5  | 22.1  |
| pcSeg-3           | 5.2   | 5.6  | 22.1  |

**Table 20.** Mean absolute deviation (MAD), standard deviation (SD) and maximum deviation (max) parameters (kcal mol<sup>-1</sup>) for PWPB95-NL density functional method using various basis sets.

| Basis Set     | MAD  | SD   | max  |
|---------------|------|------|------|
| cc-pVTZ       | 0.34 | 0.38 | 1.42 |
| cc-pVQZ       | 0.35 | 0.38 | 1.47 |
| aug-cc-pVTZ   | 0.35 | 0.38 | 1.51 |
| aug-cc-pVQZ   | 0.35 | 0.38 | 1.51 |
| def2-TZVPP    | 0.36 | 0.39 | 1.46 |
| def2-QZVPP    | 0.35 | 0.38 | 1.43 |
| ma-def2-QZVPP | 0.35 | 0.38 | 1.43 |
| aug-pcSeg-2   | 0.36 | 0.39 | 1.31 |

**Table 21.** Percentage mean absolute relative error (%MARE), standard deviation (SD) and maximum deviation (max) parameters (%) for PWPB95-NL density functional method using various basis sets.

| Basis Set     | %MARE | SD  | max  |
|---------------|-------|-----|------|
| cc-pVTZ       | 2.2   | 2.7 | 12.8 |
| cc-pVQZ       | 2.3   | 2.7 | 12.8 |
| aug-cc-pVTZ   | 2.3   | 2.7 | 12.3 |
| aug-cc-pVQZ   | 2.3   | 2.7 | 12.7 |
| def2-TZVPP    | 2.4   | 2.8 | 12.7 |
| def2-QZVPP    | 2.3   | 2.7 | 12.8 |
| ma-def2-QZVPP | 2.3   | 2.7 | 12.8 |
| aug-pcSeg-2   | 2.4   | 2.8 | 13.1 |

**Table 22.** Energies for Example 1 (sesquiterpene cations, A–D) in kcal mol<sup>-1</sup>. Except for B3LYP, all other density functionals apply def2-QZVPP basis set.

| METHOD              | ENERGIES                  |          |                           |           |
|---------------------|---------------------------|----------|---------------------------|-----------|
|                     | E <sub>a</sub> (C-to-D2)* | ΔH(D2-C) | E <sub>a</sub> (B-to-D1)* | ΔH(D1-B)* |
| CCSD(T)/cc-pVQZ     | 65.0                      | 21.0     | -1.6                      | -3.7      |
| N12-D3              | 58.8                      | 16.1     | 0.3                       | -1.5      |
| PBE-NL              | 55.9                      | 15.2     | -0.8                      | -2.3      |
| PKZB-D3             | 58.8                      | 16.8     | 0.4                       | -0.3      |
| revTPSS-D4          | 54.7                      | 16.0     | 0.4                       | 1.3       |
| MN15-D3(BJ)         | 63.2                      | 18.5     | -0.5                      | -3.4      |
| TPSS0-D3(BJ)        | 61.7                      | 17.4     | -0.5                      | -2.7      |
| DSD-PBEP86-NL       | 63.8                      | 20.0     | -1.5                      | -3.0      |
| PWPB95-NL           | 61.7                      | 19.5     | -1.1                      | -2.8      |
| ωB97X-2-D3(BJ)      | 64.1                      | 19.9     | -1.6                      | -2.8      |
| B3LYP/6-31+G(d,p)** | 59.4                      | 11.1     | 1.1                       | -1.1      |

\*D1 and D2 are conformers

\*\*Differently from energies reported here, ZPE contribution was included in the original reference.

**Table 23.** Energies for Example 2 (aryl cations, E–I) in kcal mol<sup>-1</sup>. Except for B3LYP, all other density functionals apply def2-QZVPP basis set.

| METHOD             | ENERGIES |                         |         |         |
|--------------------|----------|-------------------------|---------|---------|
|                    | ΔE(F-E)  | E <sub>a</sub> (F-to-G) | ΔH(H-F) | ΔE(I-H) |
| CCSD(T)/cc-pVQZ    | -9.0     | 6.9                     | 3.2     | -14.2   |
| PBE-NL             | -11.5    | 5.1                     | 2.8     | -17.1   |
| N12-D3             | -11.3    | 5.1                     | 2.9     | -17.4   |
| PKZB-D3            | -9.8     | 5.1                     | 3.3     | -15.9   |
| revTPSS-D4         | -11.0    | 3.9                     | 2.9     | -16.6   |
| TPSS0-D3(BJ)       | -11.0    | 6.0                     | 3.4     | -16.9   |
| MN15-D3(BJ)        | -10.9    | 6.2                     | 3.1     | -16.3   |
| DSD-PBEP86-NL      | -10.1    | 5.8                     | 3.3     | -15.4   |
| PWPB95-NL          | -10.8    | 5.6                     | 3.0     | -16.0   |
| ωB97X-2-D3(BJ)     | -9.8     | 5.9                     | 3.6     | -15.3   |
| B3LYP/6-31+G(d,p)* | -10.9    | 10.0                    | 2.8     | -17.4   |

\*In the original reference, solvation contribution was included. Values here are in the gas phase.

**Table 24.** Mean absolute deviation (MAD), standard deviation (SD) and maximum deviation (kcal mol<sup>-1</sup>) values for selected density functional methods applied to examples 1 and 2 (cations A–I). Except for B3LYP, all methods apply def2-QZVPP basis set.

| <b>Method</b>          | <b>MAD</b> | <b>SD</b> | <b>max</b> |
|------------------------|------------|-----------|------------|
| B3LYP/6-31+G(d,p)      | 3.83       | 3.32      | 11.0       |
| N12-D3                 | 2.81       | 1.93      | 6.30       |
| PBE-NL                 | 3.07       | 2.98      | 9.17       |
| PKZB-D3                | 2.50       | 2.01      | 6.24       |
| revTPSS-D4             | 3.71       | 3.12      | 10.35      |
| MN15-D3(BJ)            | 1.28       | 0.89      | 2.50       |
| TPSS0-D3(BJ)           | 1.83       | 1.24      | 3.62       |
| PWPB95-NL              | 1.38       | 0.98      | 3.33       |
| DSD-PBEP86-NL          | 0.79       | 0.45      | 1.24       |
| $\omega$ B97X-2-D3(BJ) | 0.76       | 0.34      | 1.09       |
