# Supplementary material for: A comprehensive benchmark investigation of quantum chemical methods for carbocations
Source: Royal Society of Chemistry journal article supplement (doi:10.1039/d2cp04603b), 2022-12-08
Supplement: d2cp04603b3.xlsx [file d2cp04603b3.xlsx]

## Sheet: Geometry Comparison
Comparing Geometries: SCS-MP2-D3(BJ)/aug-cc-pVQZ vs. DLPNO-CCSD/cc-pVQZ
C-C Bond	SCS-MP2	CCSD(T)	DEVIATION		C-H Bond	SCS-MP2	CCSD(T)	DEVIATION
1A	1.376	1.377	0.001		1A	1.08	1.083	0.003
2B	1.706	1.717	0.011			1.312	1.309	0.003
	1.778	1.807	0.029		2B	1.078	1.081	0.003
	1.384	1.385	0.001			1.098	1.099	0.001
2C	1.485	1.49	0.005			1.075	1.079	0.004
3B	1.468	1.473	0.005			1.077	1.081	0.004
	1.395	1.405	0.01		2C	1.278	1.285	0.007
	1.657	1.642	0.015			1.079	1.082	0.003
4B	1.344	1.349	0.005			1.075	1.078	0.003
	1.638	1.65	0.012		3C	1.097	1.093	0.004
	1.409	1.41	0.001			1.087	1.084	0.003
5C	1.628	1.628	0			1.081	1.085	0.004
	1.425	1.433	0.008			1.077	1.081	0.004
	1.686	1.728	0.042			1.095	1.098	0.003
	1.476	1.482	0.006			1.08	1.083	0.003
5I	1.418	1.421	0.003		4B	1.077	1.08	0.003
	1.636	1.647	0.011			1.075	1.078	0.003
	1.524	1.535	0.011			1.073	1.077	0.004
	1.679	1.702	0.023			1.081	1.083	0.002
5K	1.555	1.563	0.008		5C	1.077	1.081	0.004
	1.51	1.519	0.009			1.075	1.079	0.004
	1.761	1.792	0.031			1.077	1.081	0.004
		MAD	0.0112273			1.076	1.08	0.004
		max	0.042			1.084	1.086	0.002
						1.09	1.094	0.004
					5K	1.085	1.087	0.002
						1.077	1.081	0.004
						1.077	1.081	0.004
						1.082	1.085	0.003
						1.084	1.087	0.003
					5I	1.08	1.083	0.003
						1.076	1.08	0.004
						1.076	1.08	0.004
							MAD	0.00342424
							max	0.007

## Sheet: References
Energies (kcal/mol) for reference methods
	1A	1B	2A	2B	2C	2D	3A	3B	3C	3D	3E	3F	3G	3H	4A	4B	4C	4D	4E	5A	5B	5C	5D	5E	5F	5G	5H	5I	5J	5K	5L	5M	5N
CCSD(T1)/CBS(aug-cc-pVQ/T/DZ)	-49412	-49405	-74064.5	-74058.5	-74056.7	-74044.4	-98715.3	-98704.8	-98704.3	-98701.5	-98700.8	-98696.4	-98696.2	-98683.7	-97939.6	-97930.7	-97929.5	-97921.2	-97904.1	-122586	-122580	-122571	-122577	-122573	-122572	-122571	-122570	-122569	-122557	-122557	-122554	-122547	-122538
CCSD(T0)/CBS(aug-cc-pVQ/T/DZ)	-49412	-49405	-74064.5	-74058.5	-74056.7	-74044.4	-98715.3	-98704.8	-98704.3	-98701.5	-98700.8	-98696.4	-98696.2	-98683.7	-97939.6	-97930.7	-97929.5	-97921.2	-97904.1	-122586	-122580	-122571	-122577	-122573	-122572	-122571	-122570	-122569	-122557	-122557	-122554	-122547	-122538
Wn-F12	-49494.8	-49487.9	-74189.1	-74183	-74181.3	-74169.1	-98881.7	-98871	-98870.6	-98867.9	-98867.3	-98862.7	-98862.6	-98849.8	--	--	--	--	--	--	--	--	--	--	--	--	--	--	--	--	--	--	--

## Sheet: CCSD(T)
Energies (kcal/mol) for CCSD(T) using various basis sets
METHOD	1A	1B	2A	2B	2C	2D	3A	3B	3C	3D	3E	3F	3G	3H	4A	4B	4C	4D	4E	5A	5B	5C	5D	5E	5F	5G	5H	5I	5J	5K	5L	5M	5N
CCSD(T)/def2-TZVPP	-49390.1	-49383.3	-74030.9	-74025	-74023.2	-74011.1	-98669.9	-98659.7	-98659	-98656.4	-98655.7	-98651.3	-98651.1	-98638.9	-97895.9	-97887.2	-97886.2	-97877.4	-97860.4	-122530	-122524	-122523	-122522	-122518	-122516	-122516	-122515	-122514	-122502	-122502	-122499	-122492	-122483
CCSD(T)/def2-ma-TZVPP	-49390.1	-49383.2	-74030.9	-74024.9	-74023.2	-74011.1	-98669.9	-98659.7	-98659	-98656.4	-98655.7	-98651.3	-98651.1	-98638.9	-97895.9	-97887.2	-97886.2	-97877.5	-97860.4	-122530	-122524	-122523	-122522	-122518	-122516	-122516	-122515	-122514	-122502	-122502	-122499	-122492	-122483
CCSD(T)/def2-QZVPP	-49403.5	-49396.6	-74051.3	-74045.3	-74043.5	-74031.5	-98697.5	-98687	-98686.6	-98683.9	-98683.2	-98678.6	-98678.5	-98666.1	-97922.1	-97913.3	-97912.3	-97903.9	-97886.9	-122564	-122557	-122556	-122555	-122551	-122550	-122550	-122549	-122547	-122535	-122535	-122532	-122525	-122516
CCSD(T)/def2-QZVPP (RIJCOSX)	-49403.5	-49396.7	-74051.5	-74045.3	-74043.6	-74031.5	-98697.6	-98687.2	-98686.7	-98684	-98683.4	-98678.8	-98678.6	-98666.2	-97922.2	-97913.2	-97912.4	-97904	-97886.7	-122564	-122558	-122556	-122555	-122551	-122550	-122550	-122549	-122547	-122536	-122535	-122532	-122525	-122517
CCSD(T)/aug-cc-pVDZ	-49344.6	-49338.1	-73962.8	-73956	-73954.1	-73943.6	-98579.4	-98568.8	-98568.5	-98566.1	-98565.5	-98560.2	-98559.9	-98548.9	-97809.7	-97800.3	-97800.6	-97788.6	-97774	-122422	-122485	-122416	-122413	-122409	-122408	-122408	-122406	-122404	-122393	-122392	-122390	-122383	-122374
CCSD(T)/cc-pVTZ	-49389.6	-49382.7	-74029.9	-74023.8	-74022.1	-74010.1	-98668.5	-98658.2	-98657.7	-98655	-98654.3	-98649.7	-98649.6	-98637.3	-97894.5	-97885.5	-97884.9	-97876.1	-97859	-122528	-122522	-122521	-122520	-122516	-122514	-122514	-122513	-122512	-122500	-122499	-122497	-122490	-122481
CCSD(T)-aug-cc-pVTZ	-49392.1	-49385.3	-74034.1	-74028.2	-74026.2	-74014.5	-98674.6	-98664.4	-98663.7	-98661.1	-98660.5	-98655.8	-98655.6	-98643.5	-97899.8	-97891	-97890.2	-97881.8	-97864.6	-122536	-122530	-122528	-122527	-122523	-122522	-122522	-122521	-122519	-122508	-122507	-122504	-122497	-122488
CCSD(T)/aug-cc-pwCVTZ	-49394.3	-49387.5	-74037.6	-74031.6	-74029.6	-74017.9	-98679.2	-98668.9	-98668.3	-98665.7	-98665.1	-98660.3	-98660.1	-98647.9	-97904.6	-97895.7	-97894.9	-97886.5	-97869.2	-122542	-122535	-122534	-122533	-122529	-122528	-122528	-122527	-122525	-122513	-122513	-122510	-122503	-122494
CCSD(T)/cc-pVQZ	-49403.4	-49396.5	-74051.2	-74045.1	-74043.3	-74031.3	-98697.3	-98686.7	-98686.3	-98683.6	-98683	-98678.3	-98678.2	-98665.7	-97921.9	-97912.9	-97912.1	-97903.7	-97886.5	-122563	-122557	-122556	-122555	-122550	-122549	-122549	-122548	-122547	-122535	-122535	-122532	-122525	-122516
CCSD(T)/cc-pVQZ - RIJCOSX	-49403.5	-49396.6	-74051.3	-74045.2	-74043.4	-74031.4	-98697.4	-98686.9	-98686.4	-98683.7	-98683.1	-98678.5	-98678.3	-98665.9	-97922	-97913	-97912.2	-97903.8	-97886.6	-122563	-122557	-122556	-122555	-122550	-122549	-122549	-122548	-122547	-122535	-122535	-122532	-122525	-122516
CCSD(T)/CBS(def2-Q/TZVPP) (RIJCOSX)	-49412.4	-49405.3	-74065.1	-74059	-74057.2	-74045.2	-98716.5	-98705.9	-98705.5	-98702.6	-98702	-98697.4	-98697.2	-98684.9	-97940	-97931.2	-97930.1	-97922	-97904.8	-122587	-122580	-122579	-122578	-122574	-122573	-122573	-122571	-122570	-122559	-122558	-122555	-122548	-122539

## Sheet: CBS-QB3
Energies (kcal/mol) for CBS-QB3 method
METHOD	1A	1B	2A	2B	2C	2D	3A	3B	3C	3D	3E	3F	3G	3H	4A	4B	4C	4D	4E	5A	5B	5C	5D	5E	5F	5G	5H	5I	5J	5K	5L	5M	5N
CBS-QB3	-55561.6	-55555.1	-83285.4	-83276.7	-83275.1	-83263.9	-111007	-110993	-110994	-110991	-110991	-110983	-110984	-110968	-110149	-110139	-110138	-110131	-110110	-137866	-137859	-137855	-137856	-137849	-137847	-137846	-137845	-137844	-137832	-137831	-137829	-137823	-137811

## Sheet: DFAs
Energies (kcal/mol) for density functional approximations using def2-QZVPP basis set
DFA	1A	1B	2A	2B	2C	2D	3A	3B	3C	3D	3E	3F	3G	3H	4A	4B	4C	4D	4E	5A	5B	5C	5D	5E	5F	5G	5H	5I	5J	5K	5L	5M	5N
SVWN5	-49021.4	-49014.8	-73491.3	-73483.5	-73485.1	-73468.7	-97956.2	-97943.6	-97943.9	-97940.5	-97940.9	-97936.9	-97937.7	-97923.6	-97191.7	-97183.9	-97177.5	-97177.3	-97159.8	-121653	-121646	-121649	-121643	-121640	-121641	-121641	-121641	-121638	-121630	-121629	-121626	-121617	-121613
Xalpha	-48730.6	-48724.2	-73054.5	-73045.9	-73047	-73031.9	-97373	-97359.9	-97360.6	-97357.4	-97357.8	-97352.7	-97353.3	-97339.1	-96653	-96644.2	-96638.8	-96638.4	-96619.9	-120968	-120961	-120962	-120958	-120954	-120954	-120954	-120953	-120951	-120944	-120942	-120940	-120931	-120926
BLYP	-49478.7	-49475.4	-74166.3	-74155.4	-74151.1	-74145.4	-98846.4	-98832.2	-98832.7	-98833.1	-98832.8	-98821.2	-98819.4	-98808.1	-98080.9	-98066.1	-98068	-98059.6	-98039.1	-122756	-122750	-122737	-122747	-122738	-122731	-122730	-122730	-122728	-122721	-122716	-122714	-122712	-122698
HCTH/407	-49511.7	-49506.7	-74214.8	-74205.2	-74205.8	-74193.3	-98911.4	-98897.6	-98899.3	-98897.7	-98897.6	-98890	-98890.6	-98874.2	-98127.1	-98116.5	-98113.7	-98110	-98087.8	-122818	-122812	-122809	-122810	-122803	-122798	-122798	-122799	-122800	-122786	-122786	-122785	-122778	-122770
N12	-49498.9	-49494.7	-74198.6	-74190.8	-74189.1	-74177.3	-98891.8	-98879.7	-98878.9	-98878	-98877.7	-98871.2	-98870.3	-98858.2	-98124.8	-98114.5	-98111.6	-98105.6	-98088	-122813	-122807	-122804	-122804	-122799	-122798	-122798	-122798	-122794	-122784	-122785	-122781	-122774	-122766
PBE	-49432.3	-49427.1	-74099.1	-74090.8	-74089.9	-74077.6	-98759.9	-98747.4	-98747.5	-98745.9	-98745.8	-98739.1	-98738.8	-98725.6	-97988.3	-97978.2	-97975	-97970.8	-97952	-122644	-122638	-122635	-122636	-122630	-122628	-122627	-122627	-122625	-122616	-122615	-122612	-122606	-122598
RPBE	-49511.6	-49507	-74214.6	-74205.9	-74204.2	-74193.7	-98911.1	-98898.5	-98898.8	-98897.9	-98897.6	-98889.6	-98889	-98876	-98136.9	-98125.7	-98123.8	-98118.5	-98098.9	-122828	-122822	-122817	-122820	-122813	-122809	-122809	-122809	-122807	-122798	-122796	-122794	-122789	-122779
revPBE	-49492.7	-49488	-74186.4	-74177.7	-74176.2	-74165.3	-98873.5	-98861	-98861.3	-98860.2	-98860	-98852.2	-98851.6	-98838.6	-98099.9	-98088.9	-98086.8	-98081.9	-98062.3	-122782	-122776	-122771	-122773	-122767	-122764	-122763	-122764	-122762	-122752	-122751	-122748	-122743	-122733
rPW86PBE	-49624.4	-49620.4	-74385.3	-74375.5	-74372.7	-74364.2	-99139.5	-99126	-99126.2	-99125.9	-99125.6	-99116.1	-99115	-99102.2	-98360.9	-98348.2	-98348	-98340.8	-98320.4	-123110	-123104	-123095	-123102	-123093	-123088	-123087	-123087	-123086	-123077	-123073	-123071	-123067	-123056
XLYP	-49525.1	-49522.1	-74235.8	-74224.7	-74219.9	-74215	-98938.8	-98924.5	-98924.9	-98925.7	-98925.3	-98913.1	-98911.2	-98900.1	-98171.4	-98156.1	-98158.6	-98149.4	-98128.9	-122869	-122863	-122849	-122861	-122850	-122843	-122843	-122842	-122840	-122834	-122828	-122826	-122825	-122810
M06L	-49500.7	-49496.3	-74200.8	-74192.2	-74191.9	-74178.7	-98895.1	-98879.9	-98881.5	-98873.4	-98879.9	-98879.7	-98881	-98873.8	-98116.1	-98107.2	-98102.8	-98100.1	-98077	-122806	-122799	-122799	-122796	-122791	-122787	-122787	-122787	-122789	-122772	-122775	-122772	-122763	-122758
M11L	-49508.5	-49506	-74213.5	-74198.5	-74200	-74192.3	-98911.7	-98893.4	-98896.5	-98895.9	-98896.8	-98884.5	-98886	-98872.6	-98130.7	-98116.2	-98117.7	-98113.1	-98091	-122824	-122817	-122810	-122814	-122806	-122804	-122803	-122802	-122800	-122791	-122788	-122789	-122782	-122772
MN12L	-49444.6	-49440.1	-74116.7	-74105.7	-74105.4	-74094.9	-98783.5	-98769.1	-98770	-98768.2	-98768.4	-98759.9	-98759.9	-98747.2	-98018.7	-98006.4	-98005.5	-98001.1	-97980.5	-122681	-122674	-122669	-122671	-122665	-122662	-122662	-122661	-122659	-122649	-122648	-122647	-122640	-122631
MN15L	-49473.4	-49467.5	-74158.2	-74149.1	-74149.4	-74136.3	-98838.8	-98826.2	-98826.6	-98823.9	-98823.8	-98817.9	-98818.2	-98804.1	-98070.4	-98060.4	-98057.5	-98052.6	-98032.9	-122746	-122739	-122740	-122737	-122732	-122730	-122730	-122730	-122730	-122715	-122717	-122716	-122706	-122700
PKZB	-49410.2	-49404.7	-74060.2	-74052.9	-74051.6	-74039.1	-98705	-98693.7	-98693.1	-98691.4	-98691	-98685.3	-98684.8	-98671.2	-97935.1	-97926.1	-97922.4	-97916.9	-97898.1	-122575	-122569	-122568	-122566	-122562	-122559	-122559	-122558	-122558	-122545	-122547	-122543	-122536	-122529
revTPSS	-49492.1	-49486.4	-74177.7	-74179.3	-74170.4	-74163	-98870.6	-98862.1	-98859.4	-98858.2	-98856.9	-98853.5	-98852.1	-98840.2	-98098.3	-98091	-98086.1	-98077.4	-98062.1	-122780	-122775	-122774	-122772	-122769	-122767	-122767	-122766	-122766	-122751	-122754	-122749	-122742	-122736
RSCAN	-49489.5	-49484.5	-74185.9	-74177	-74176	-74163.7	-98876.9	-98863.5	-98863.1	-98861.7	-98861.6	-98854.6	-98854.4	-98840.5	-98098.7	-98088.4	-98085.2	-98080.4	-98060.7	-122785	-122778	-122775	-122775	-122770	-122767	-122767	-122767	-122765	-122755	-122753	-122750	-122744	-122736
R2SCAN	-49471.6	-49466.7	-74158.5	-74149.7	-74148.5	-74136.4	-98839.8	-98826.7	-98826.1	-98824.9	-98824.7	-98817.8	-98817.4	-98803.7	-98063.2	-98052.9	-98049.8	-98044.5	-98025.1	-122740	-122733	-122730	-122730	-122725	-122722	-122722	-122722	-122720	-122710	-122708	-122705	-122699	-122691
SCAN	-49480.7	-49475.5	-74171.8	-74163.5	-74161.8	-74150	-98857.8	-98845.2	-98844.4	-98843.1	-98842.9	-98836.2	-98835.5	-98823.5	-98080.7	-98070.2	-98067.7	-98060.4	-98043.3	-122762	-122755	-122752	-122752	-122747	-122746	-122746	-122745	-122742	-122732	-122732	-122729	-122722	-122714
TPSS	-49517.6	-49512.8	-74223.1	-74216.4	-74213.8	-74202.2	-98922.7	-98912.2	-98910.7	-98909.9	-98909	-98903	-98901.9	-98890.2	-98148	-98138.3	-98135.4	-98127.6	-98110.8	-122843	-122837	-122833	-122834	-122829	-122826	-122825	-122825	-122824	-122813	-122812	-122808	-122804	-122795
tHCTH	-49503.2	-49498.9	-74202.3	-74192.7	-74191.6	-74181.2	-98894.6	-98881.2	-98882.1	-98881.2	-98881	-98872.4	-98872.2	-98858.2	-98111.3	-98099.9	-98098.3	-98092.4	-98072.1	-122798	-122793	-122787	-122790	-122783	-122778	-122778	-122778	-122777	-122767	-122765	-122763	-122758	-122748
APFD	-49461.9	-49456.4	-74142.6	-74135	-74134.5	-74121.5	-98818.8	-98806.8	-98806.6	-98804.7	-98804.5	-98798.8	-98798.8	-98785.7	-98040.2	-98031	-98027.5	-98021.7	-98004	-122712	-122705	-122704	-122702	-122698	-122698	-122697	-122697	-122695	-122683	-122684	-122681	-122673	-122666
B1B95	-49476	-49469.7	-74161.2	-74154.3	-74153.9	-74139.8	-98842.1	-98830.6	-98830.6	-98828	-98827.8	-98822.9	-98823	-98809	-98070.3	-98061.8	-98057.5	-98053.4	-98034.2	-122746	-122740	-122740	-122737	-122734	-122732	-122732	-122732	-122731	-122718	-122720	-122716	-122708	-122702
B3LYP	-49510.1	-49506	-74213.2	-74202.9	-74199.7	-74192.3	-98910.2	-98896.3	-98896.9	-98896.5	-98896.3	-98885.9	-98884.9	-98872.9	-98134	-98120.3	-98121.4	-98112.8	-98092.7	-122826	-122819	-122810	-122817	-122808	-122804	-122803	-122803	-122800	-122792	-122789	-122787	-122783	-122770
B97	-49490.7	-49486.2	-74183.8	-74175	-74172.1	-74163	-98871.1	-98858.5	-98858.4	-98857.5	-98857.3	-98848.7	-98847.6	-98836.3	-98095.3	-98083.4	-98082.8	-98075.3	-98056.7	-122777	-122771	-122765	-122769	-122762	-122760	-122759	-122759	-122755	-122746	-122745	-122743	-122737	-122726
B98	-49487.4	-49483.1	-74179.4	-74170.3	-74166.8	-74158.6	-98865.6	-98852.8	-98852.5	-98852	-98851.7	-98842.6	-98841.2	-98830.7	-98089.1	-98076.5	-98076.7	-98068.4	-98050.3	-122770	-122764	-122757	-122761	-122754	-122752	-122752	-122752	-122747	-122739	-122737	-122734	-122729	-122718
BB1K	-49478.7	-49473.3	-74166	-74158.4	-74156.9	-74144.6	-98847.2	-98835.5	-98835.2	-98833.6	-98833.3	-98827	-98826.4	-98813.1	-98080.1	-98070.4	-98066.7	-98063.4	-98043.7	-122757	-122751	-122747	-122748	-122743	-122739	-122739	-122739	-122738	-122728	-122727	-122724	-122718	-122710
BHandHLYP	-49474.7	-49470.5	-74159.7	-74149.1	-74146.5	-74139	-98839.7	-98825.3	-98826.2	-98825.6	-98825.5	-98815.1	-98814.6	-98802.3	-98065.9	-98052.3	-98053.7	-98043.4	-98023.8	-122740	-122734	-122726	-122731	-122723	-122721	-122720	-122720	-122716	-122705	-122704	-122703	-122696	-122686
CAMB3LYP	-49474	-49469.1	-74160.6	-74150.7	-74148.6	-74139.6	-98842.2	-98828.1	-98828.9	-98827.8	-98827.8	-98818.7	-98818.3	-98805.5	-98066.5	-98054.4	-98054.1	-98046.8	-98026.9	-122743	-122736	-122731	-122734	-122726	-122724	-122724	-122724	-122721	-122711	-122709	-122707	-122701	-122691
HSE06	-49445.9	-49440.3	-74118.5	-74110.4	-74110	-74097.1	-98786.2	-98773.7	-98774	-98771.9	-98771.8	-98765.6	-98765.9	-98752.1	-98010.3	-98000.6	-97997.5	-97992.1	-97973.3	-122673	-122667	-122665	-122664	-122659	-122658	-122658	-122658	-122656	-122644	-122645	-122642	-122634	-122627
LC-wHPBE	-49472.7	-49466.1	-74157.5	-74150.5	-74151.7	-74136.4	-98540.2	-98527.7	-98528.6	-98524.4	-98524.8	-98522.3	-98524.3	-98508.4	-98052.7	-97751	-98040.2	-97743.9	-97724.6	-122730	-122722	-122728	-122720	-122718	-122720	-122720	-122721	-122718	-122338	-122343	-122705	-122326	-122690
LC-PBE	-49318.5	-49310.8	-73930.4	-73923.7	-73926.7	-73908.7	-98839.2	-98826.9	-98827.4	-98824.5	-98824.6	-98820.4	-98821.4	-98806.4	-97756.1	-98046.1	-97743.2	-98038.4	-98018.7	-122362	-122354	-122364	-122351	-122350	-122356	-122356	-122356	-122353	-122703	-122707	-122341	-122693	-122326
MN12SX	-49456.2	-49451.1	-74133.1	-74123.7	-74123.3	-74112.4	-98805.9	-98792.5	-98793.5	-98791.4	-98791.5	-98784	-98784.2	-98771.4	-98035.3	-98024.3	-98023	-98018.4	-97998.3	-122703	-122696	-122694	-122694	-122688	-122687	-122686	-122686	-122684	-122673	-122673	-122671	-122664	-122655
MPW1B95	-49473.6	-49467.2	-74158.3	-74151.6	-74151.2	-74137	-98839.1	-98827.7	-98827.5	-98824.9	-98824.7	-98820	-98820.2	-98806.2	-98066.9	-98058.6	-98054.2	-98049.8	-98030.9	-122743	-122736	-122737	-122734	-122730	-122729	-122729	-122729	-122728	-122714	-122716	-122713	-122704	-122697
MPW1PW91	-49494.4	-49488.9	-74190.3	-74182.3	-74181.6	-74169.1	-98881.4	-98868.9	-98869.1	-98867.2	-98867.1	-98860.6	-98860.7	-98847.4	-98102.3	-98092.5	-98089.6	-98084	-98065.3	-122788	-122782	-122780	-122779	-122774	-122773	-122773	-122773	-122770	-122759	-122760	-122757	-122749	-122742
MPWB1K	-49473.4	-49466.7	-74157.7	-74151.1	-74151.2	-74136.4	-98838.7	-98827.3	-98827.3	-98824.4	-98824.1	-98819.8	-98820.4	-98806.2	-98064.2	-98056.3	-98051.8	-98047	-98028.3	-122741	-122734	-122736	-122731	-122728	-122728	-122728	-122728	-122726	-122712	-122715	-122712	-122702	-122699
N12SX	-49480.8	-49475.8	-74171.2	-74163.6	-74162.9	-74149.9	-98856.3	-98844.2	-98843.6	-98842.1	-98842	-98836	-98836.1	-98823.4	-98080.9	-98071.5	-98068.1	-98062	-98044.8	-122761	-122755	-122754	-122752	-122747	-122748	-122748	-122748	-122744	-122733	-122734	-122730	-122723	-122716
O3LYP	-49383.9	-49378.1	-74026.8	-74018.5	-74018.8	-74005	-98664.2	-98651.4	-98652.2	-98649.9	-98649.9	-98643.9	-98644.3	-98630.1	-97892.6	-97883.1	-97879.3	-97875.6	-97856.5	-122525	-122519	-122518	-122516	-122511	-122510	-122510	-122510	-122508	-122497	-122498	-122495	-122487	-122480
PBE0	-49441.6	-49435.7	-74111.9	-74104.1	-74104	-74090.5	-98777.6	-98765.3	-98765.6	-98763.3	-98763.2	-98757.5	-98757.8	-98744.1	-98001.2	-97992	-97988.5	-97983.5	-97965	-122662	-122656	-122655	-122653	-122648	-122648	-122648	-122648	-122645	-122634	-122635	-122632	-122624	-122617
SCAN0	-49472.6	-49466.6	-74158.8	-74151	-74150.1	-74137.1	-98840.9	-98828.5	-98828.3	-98826.1	-98825.9	-98820.2	-98820.2	-98807	-98062.2	-98052.7	-98049.5	-98042.7	-98024.9	-122740	-122732	-122732	-122730	-122726	-122725	-122725	-122725	-122722	-122710	-122711	-122708	-122699	-122693
SOGGA11X	-49496.7	-49490.8	-74191.9	-74184	-74183.6	-74171.1	-98883.2	-98870.8	-98871.5	-98869.2	-98869	-98862.8	-98863.2	-98849.5	-98102.7	-98092.8	-98090.5	-98083.6	-98064.8	-122789	-122782	-122781	-122780	-122775	-122774	-122774	-122774	-122772	-122758	-122760	-122758	-122749	-122742
wB97X	-49492	-49486.6	-74186.3	-74177.9	-74177.6	-74165.5	-98876.8	-98863.6	-98864	-98862.2	-98862.3	-98855.8	-98856.1	-98841.4	-98096.8	-98087.6	-98084.7	-98079.1	-98059.1	-122782	-122775	-122776	-122773	-122768	-122768	-122768	-122768	-122766	-122751	-122754	-122752	-122742	-122736
X3LYP	-49456.4	-49452.3	-74133.3	-74123	-74119.9	-74112.4	-98804.2	-98790.2	-98790.8	-98790.4	-98790.2	-98779.9	-98779	-98766.9	-98033.8	-98020.2	-98021.2	-98012.5	-97992.7	-122699	-122693	-122684	-122691	-122682	-122678	-122677	-122677	-122674	-122666	-122662	-122661	-122656	-122644
BMK	-49467.4	-49462.4	-74149.7	-74143.9	-74140.4	-74129	-98827.6	-98817.5	-98814.9	-98813.8	-98813.3	-98808.4	-98806.4	-98795.7	-98053	-98044.2	-98040.9	-98034.9	-98017.1	-122726	-122719	-122720	-122717	-122714	-122715	-122715	-122715	-122710	-122696	-122702	-122697	-122687	-122679
M05	-49463.6	-49459.6	-74144.2	-74138	-74137.3	-74123.3	-98818.7	-98807.3	-98805.4	-98804.8	-98804.7	-98800.5	-98800.1	-98782	-98043.3	-98037.6	-98030.7	-98027.7	-98004	-122713	-122706	-122712	-122704	-122701	-122700	-122700	-122701	-122702	-122680	-122689	-122683	-122672	-122669
M06	-49465.8	-49462	-74148.7	-74140.6	-74138.4	-74127.6	-98826.3	-98813.6	-98811.8	-98811.3	-98811.4	-98804.8	-98803.7	-98789.1	-98049.8	-98041	-98037.5	-98032.4	-98010.3	-122723	-122716	-122715	-122713	-122708	-122706	-122706	-122706	-122705	-122689	-122693	-122688	-122679	-122675
M062X	-49477.8	-49471.6	-74165	-74159.3	-74158	-74144.6	-98849.4	-98838.7	-98837.8	-98835.3	-98835	-98830.9	-98830.7	-98815.6	-98074.9	-98068.1	-98063	-98059.7	-98038.3	-122755	-122748	-122750	-122745	-122743	-122740	-122741	-122740	-122741	-122725	-122727	-122723	-122715	-122709
M08HX	-49494.3	-49489.2	-74191	-74183.8	-74182.4	-74170.3	-98884.1	-98871.9	-98871.4	-98869.3	-98869.3	-98863.6	-98863.5	-98849.5	-98102.8	-98094.7	-98090.6	-98087.4	-98066.7	-122791	-122784	-122785	-122782	-122778	-122777	-122777	-122776	-122776	-122763	-122763	-122760	-122752	-122745
MN15	-49464.1	-49457.5	-74143.5	-74136.4	-74135.4	-74122.5	-98819.8	-98808.4	-98808.2	-98805.5	-98805.2	-98800.2	-98800.1	-98787.1	-98046.8	-98038.2	-98034.7	-98030	-98011.1	-122719	-122712	-122712	-122709	-122706	-122704	-122704	-122703	-122702	-122689	-122691	-122688	-122680	-122674
PW6B95	-49569.6	-49563.7	-74301.9	-74294.6	-74293.2	-74280.7	-99029.8	-99018.1	-99017.8	-99015.8	-99015.5	-99009.6	-99009.4	-98996	-98253.6	-98244.2	-98241.1	-98235.4	-98216.2	-122977	-122970	-122969	-122968	-122963	-122961	-122961	-122960	-122959	-122946	-122948	-122944	-122937	-122930
revPBE0	-49487.1	-49481.6	-74177.7	-74169.7	-74169.1	-74156.7	-98863.4	-98851	-98851.5	-98849.6	-98849.4	-98842.8	-98843	-98829.4	-98085.4	-98075.6	-98072.8	-98067.3	-98048.2	-122766	-122760	-122758	-122757	-122752	-122751	-122751	-122751	-122748	-122736	-122737	-122735	-122727	-122719
revTPSS0	-49499.6	-49493.5	-74195	-74189.8	-74188	-74174.3	-98886.6	-98877.1	-98875.4	-98873.6	-98872.7	-98868.8	-98868.2	-98855.6	-98108.3	-98100.7	-98096.3	-98087.6	-98071.7	-122795	-122789	-122790	-122786	-122783	-122782	-122782	-122782	-122781	-122766	-122769	-122764	-122756	-122751
revTPSSh	-49502.2	-49496.4	-74198.8	-74193.9	-74191.4	-74178.1	-98891	-98882	-98879.7	-98878.3	-98877.2	-98873.4	-98872.3	-98876.4	-98115.4	-98119.6	-98103.4	-98094.4	-98092	-122803	-122797	-122797	-122794	-122791	-122789	-122789	-122789	-122788	-122773	-122776	-122771	-122764	-122758
TPSS0	-49506.6	-49501	-74206.3	-74199.6	-74198.2	-74185.5	-98901.6	-98890.6	-98889.8	-98888.2	-98887.6	-98882.2	-98881.9	-98874	-98122.9	-98117.6	-98110.6	-98103	-98089.9	-122813	-122807	-122806	-122804	-122800	-122799	-122799	-122798	-122797	-122784	-122785	-122781	-122774	-122767
TPSSh	-49513.1	-49507.9	-74216.1	-74209.5	-74207.4	-74195.2	-98913.9	-98903.2	-98902	-98900.8	-98900.1	-98894.3	-98893.6	-98881.5	-98137.6	-98128.2	-98125.2	-98117.4	-98100.5	-122830	-122824	-122822	-122822	-122817	-122814	-122814	-122814	-122813	-122801	-122801	-122797	-122791	-122784
tHCTHhyb	-49503.7	-49499.3	-74204	-74195.3	-74192.5	-74183.1	-98898.6	-98885.9	-98885.6	-98884.8	-98884.6	-98876.3	-98875.2	-98863.6	-98117.8	-98106.1	-98105.2	-98097.7	-98079.3	-122807	-122801	-122795	-122798	-122792	-122790	-122789	-122789	-122786	-122776	-122775	-122772	-122767	-122756
B2CN-PLYP	-49379.5	-49371.1	-74016.2	-74012.9	-74011.4	-73995.7	-98652.2	-98644	-98642.5	-98638.5	-98637.5	-98636.6	-98636.5	-98622	-97881.3	-97875.3	-97871.3	-97865.7	-97846.4	-122513	-122507	-122510	-122504	-122503	-122501	-122501	-122500	-122501	-122486	-122488	-122483	-122475	-122469
B2GP-PLYP	-49450.4	-49444.6	-74123.3	-74115.7	-74113.4	-74102.7	-98792.7	-98780.9	-98780.6	-98778.9	-98778.4	-98771.8	-98771.3	-98758.3	-98020.3	-98009.5	-98009	-98000.7	-97981.3	-122685	-122678	-122674	-122676	-122670	-122667	-122667	-122667	-122665	-122653	-122652	-122650	-122643	-122634
B2PLYP	-49459.7	-49454.4	-74137.3	-74129.1	-74126.4	-74116.7	-98810.7	-98798.5	-98798.4	-98797	-98796.5	-98789	-98788.3	-98775.7	-98039.4	-98027.9	-98027.9	-98019.4	-97999.9	-122708	-122702	-122695	-122699	-122692	-122689	-122689	-122688	-122686	-122676	-122674	-122671	-122666	-122655
DOD-SCAN	-49274	-49269.3	-73854.1	-73844.4	-73841.1	-73834.6	-98430.7	-98417.5	-98768.2	-98765.8	-98417.1	-98407.1	-98760.1	-98394.9	-97670.8	-97657.7	-97660.2	-97648.5	-97628.8	-122242	-122235	-122229	-122233	-122225	-122224	-122223	-122653	-122219	-122206	-122206	-122205	-122198	-122187
DSD-PBEB95	-49415	-49407.9	-74069.3	-74063.7	-74062.7	-74048.7	-98721.2	-98711	-98710.5	-98707.4	-98706.8	-98703.3	-98703.3	-98689.7	-97949.9	-97942.1	-97938.9	-97932.7	-97914.1	-122597	-122591	-122592	-122588	-122585	-122584	-122584	-122583	-122583	-122569	-122571	-122567	-122559	-122552
DSD-PBEP86	-49414.6	-49407.8	-74069.6	-74063.5	-74062.1	-74049	-98722.2	-98711.5	-98711	-98708.3	-98707.7	-98703.4	-98703.4	-98689.9	-97948.2	-97939.6	-97937.2	-97930.3	-97911.7	-122596	-122590	-122589	-122587	-122583	-122582	-122582	-122581	-122580	-122567	-122568	-122565	-122557	-122549
LS1DH-PBE	-49445.5	-49438.3	-74116.7	-74110.9	-74110.9	-74095.8	-98785.7	-98775.2	-98774.7	-98771.4	-98771	-98767.9	-98768.5	-98754.2	-98007.3	-97999.9	-97995.9	-97990.4	-97971.9	-122672	-122665	-122668	-122662	-122660	-122661	-122661	-122660	-122658	-122644	-122647	-122643	-122634	-122629
MPW2PLYP	-49459.2	-49453.8	-74136.5	-74128.1	-74125.5	-74115.9	-98810.1	-98797.7	-98797.6	-98796.3	-98795.8	-98788.2	-98787.6	-98774.9	-98038.3	-98026.7	-98026.8	-98018	-97998.6	-122707	-122701	-122695	-122698	-122691	-122688	-122688	-122687	-122685	-122675	-122673	-122671	-122665	-122655
PBE0-2	-49442.2	-49434.8	-74111.5	-74106.1	-74106	-74090.7	-98779	-98768.8	-98768.2	-98764.8	-98764.2	-98761.6	-98762.1	-98747.7	-98001.2	-97994.1	-97990	-97984.5	-97966	-122664	-122658	-122661	-122655	-122653	-122653	-122653	-122653	-122651	-122637	-122639	-122636	-122626	-122621
PBE0DH	-49413.5	-49407.8	-74068.3	-74060.1	-74059.9	-74047.3	-98719.3	-98706.5	-98707.1	-98704.9	-98704.8	-98698.4	-98699	-98685.3	-97943.5	-97933.8	-97931.1	-97924.5	-97905.9	-122589	-122582	-122583	-122580	-122575	-122576	-122576	-122576	-122573	-122559	-122561	-122559	-122549	-122544
PBEQIDH	-49357.6	-49352.6	-73983	-73973.5	-73972.7	-73962.4	-98604.5	-98590.8	-98591.8	-98590.2	-98590.2	-98581.9	-98582.4	-98569.1	-97834.1	-97822.9	-97822.1	-97813.4	-97794.3	-122450	-122443	-122441	-122440	-122435	-122436	-122435	-122435	-122431	-122418	-122420	-122418	-122408	-122402
PWPB95	-49464.9	-49458.4	-74143.9	-74137.4	-74135.9	-74123.3	-98819.7	-98808.8	-98808.4	-98806	-98805.5	-98800.5	-98800.3	-98787.3	-98047.6	-98038.6	-98036.1	-98029.3	-98011	-122719	-122712	-122711	-122710	-122705	-122704	-122704	-122703	-122702	-122689	-122690	-122687	-122679	-122672
revDOD-PBEP86	-49417.4	-49411	-74072.3	-74065.5	-74063.5	-74052.2	-98724.4	-98713.3	-98713.3	-98710.9	-98710.4	-98704.7	-98704.4	-98692	-97950.2	-97940.5	-97939.6	-97931.1	-97913	-122597	-122591	-122588	-122589	-122584	-122582	-122582	-122581	-122580	-122567	-122568	-122565	-122558	-122549
revDSD-PBEP86	-49410.8	-49404.3	-74062.6	-74055.8	-74053.9	-74042.4	-98711.6	-98700.6	-98700.4	-98698	-98697.5	-98692	-98691.7	-98679.1	-97938.4	-97928.7	-97927.6	-97919.5	-97901.2	-122582	-122577	-122574	-122574	-122569	-122567	-122567	-122566	-122565	-122553	-122553	-122550	-122543	-122534
RSX-0DH	-49387	-49379.7	-74031.5	-74025	-74026.8	-74010.1	-98673.9	-98662	-98662.4	-98658.6	-98658.7	-98655.8	-98657.3	-98642.4	-97892.3	-97886	-97880	-97876.8	-97858.8	-122530	-122523	-122530	-122520	-122518	-122523	-122523	-122523	-122520	-122505	-122509	-122507	-122493	-122492
RSX-QIDH	-49399.7	-49392.3	-74049.5	-74043.6	-74044.6	-74028.4	-98697.4	-98686.4	-98686.2	-98682.6	-98682.4	-98679.7	-98680.8	-98666.3	-97918.2	-97911.6	-97906.5	-97902	-97884.1	-122562	-122555	-122560	-122552	-122550	-122553	-122553	-122553	-122550	-122536	-122539	-122536	-122524	-122521
wB97M-2	-49515.1	-49508.6	-74220.1	-74213	-74211.3	-74199.7	-98922.6	-98911.1	-98910.8	-98908.6	-98908.1	-98902.7	-98902.5	-98889.5	-98147.2	-98137.7	-98136.1	-98128.7	-98110.1	-122845	-122838	-122837	-122836	-122831	-122830	-122830	-122830	-122828	-122815	-122816	-122813	-122805	-122797
wB97X-2(TQZ)	-49462.4	-49455.8	-74141.1	-74134.9	-74133.2	-74120.7	-98817.4	-98806.8	-98805.9	-98803.6	-98803	-98798.4	-98798.2	-98784.9	-98043.5	-98034.9	-98032.5	-98025.5	-98006.8	-122715	-122709	-122708	-122706	-122702	-122701	-122701	-122700	-122699	-122686	-122687	-122683	-122676	-122668
SOS0-PBE0-2	-49338.1	-49332	-73950.4	-73943.1	-73940	-73931	-98560.5	-98549.1	-98549.4	-98547.4	-98546.7	-98547.4	-98539.1	-98527.3	-97792.8	-97782.1	-97782.9	-97772.6	-97753.7	-122397	-122392	-122387	-122389	-122383	-122381	-122381	-122380	-122379	-122365	-122366	-122364	-122357	-122347

## Sheet: Dispersion Corrections
Energies (kcal/mol) for dispersion-corrected density functional approximations using def2-QZVPP basis set
Method	1A	1B	2A	2B	2C	2D	3A	3B	3C	3D	3E	3F	3G	3H	4A	4B	4C	4D	4E	5A	5B	5C	5D	5E	5F	5G	5H	5I	5J	5K	5L	5M	5N
N12-D3	-49499.3	-49495.3	-74200.5	-74192.9	-74190.9	-74179.4	-98895.8	-98883.9	-98882.2	-98881.7	-98881.4	-98875.2	-98874.2	-98862.7	-98127.1	-98117.3	-98114.3	-98107.2	-98090.8	-122818	-122811	-122809	-122809	-122804	-122803	-122803	-122803	-122799	-122789	-122790	-122785	-122779	-122771
PBE-D3(BJ)	-49434	-49428.9	-74102.5	-74094.3	-74093.4	-74081.1	-98765.3	-98752.9	-98752.5	-98751.2	-98750.9	-98744.6	-98744.2	-98731.3	-97992.7	-97982.7	-97979.7	-97974.7	-97956.7	-122651	-122645	-122642	-122642	-122637	-122635	-122634	-122634	-122632	-122623	-122622	-122619	-122612	-122604
PBE-D4	-49433.2	-49428.1	-74101.4	-74093.1	-74092.2	-74079.9	-98763.9	-98751.4	-98751.2	-98749.8	-98749.5	-98743.1	-98742.8	-98729.7	-97991.6	-97981.5	-97978.5	-97973.7	-97955.5	-122650	-122643	-122640	-122641	-122635	-122633	-122633	-122633	-122631	-122622	-122620	-122617	-122611	-122603
PBE-NL	-49394.8	-49389.5	-74044.2	-74036.3	-74035.5	-74022.7	-98688	-98676	-98675.5	-98673.8	-98673.6	-98667.8	-98667.5	-98654.6	-97920	-97910.7	-97906.9	-97902.2	-97884.6	-122559	-122553	-122551	-122551	-122546	-122544	-122544	-122544	-122542	-122532	-122532	-122528	-122521	-122514
B97M-D3(BJ)	-49551.8	-49548.1	-74279	-74268	-74267.1	-74257	-99000.2	-98985	-98984.9	-98984.8	-98984.7	-98975.8	-98975.7	-98961.4	-98217.7	-98205	-98204.9	-98196.2	-98176.2	-122934	-122927	-122922	-122924	-122917	-122913	-122913	-122913	-122912	-122900	-122899	-122897	-122889	-122881
B97M-D4	-49549.8	-49545.9	-74275.4	-74264.3	-74263.3	-74253.5	-98995.2	-98980.1	-98980.4	-98980	-98980	-98970.8	-98970.7	-98956.2	-98213	-98200.3	-98200	-98192.1	-98171.2	-122928	-122921	-122916	-122918	-122911	-122907	-122907	-122907	-122906	-122893	-122893	-122891	-122883	-122874
B97M-V	-49507.1	-49503.1	-74211.5	-74200.8	-74199.9	-74189.6	-98910.1	-98895.3	-98895.7	-98894.9	-98894.8	-98886.2	-98886.2	-98871.6	-98133	-98121	-98119.9	-98112.3	-98091.7	-122827	-122820	-122816	-122817	-122810	-122807	-122807	-122807	-122806	-122793	-122793	-122791	-122783	-122775
PKZB-D3	-49410.6	-49405.3	-74062.2	-74054.9	-74053.5	-74041.3	-98709	-98698	-98696.5	-98695.2	-98694.7	-98689.4	-98688.8	-98675.7	-97937.3	-97928.9	-97925	-97918.5	-97900.9	-122579	-122573	-122572	-122570	-122567	-122564	-122564	-122564	-122563	-122552	-122552	-122548	-122540	-122534
revTPSS-D3(BJ)	-49489.5	-49483.9	-74181.4	-74177.1	-74174.3	-74160.7	-98869.1	-98860.7	-98857.2	-98856.4	-98855	-98852	-98850.6	-98839.3	-98095.5	-98088.2	-98083.6	-98073.6	-98060	-122779	-122773	-122772	-122770	-122767	-122765	-122765	-122765	-122764	-122751	-122753	-122747	-122740	-122735
revTPSS-D4	-49488.7	-49483	-74180.1	-74175.7	-74172.9	-74159.3	-98867.3	-98858.8	-98855.6	-98854.6	-98853.2	-98850.2	-98848.8	-98837.3	-98094	-98086.7	-98082.1	-98072.4	-98058.4	-122777	-122771	-122771	-122768	-122765	-122763	-122763	-122763	-122762	-122749	-122751	-122745	-122739	-122733
revTPSS-NL	-49441.1	-49435.2	-74109.4	-74105.6	-74103	-74088.6	-98773.8	-98765.8	-98762.2	-98761	-98759.6	-98757.4	-98756.1	-98744.8	-98005.7	-97999.4	-97993.9	-97984	-97971	-122666	-122660	-122661	-122657	-122655	-122654	-122654	-122654	-122653	-122639	-122642	-122635	-122628	-122624
wB97X-D3(BJ)	-49534.4	-49529.2	-74249.8	-74241.6	-74240.7	-74229.3	-98961.7	-98948.7	-98948.3	-98947.2	-98947	-98940.5	-98940.6	-98927.3	-98177.4	-98167.8	-98165.8	-98158.3	-98140.4	-122884	-122877	-122877	-122875	-122870	-122870	-122870	-122870	-122867	-122854	-122856	-122853	-122844	-122838
wB97X-D4	-49492.1	-49486.7	-74186.6	-74178.2	-74177.8	-74165.8	-98877.4	-98864.1	-98864.5	-98862.7	-98862.8	-98856.3	-98856.6	-98841.9	-98097.2	-98088	-98085.1	-98079.4	-98059.5	-122783	-122776	-122776	-122774	-122769	-122768	-122768	-122769	-122767	-122752	-122755	-122753	-122742	-122736
wB97X-V	-49490.4	-49484.8	-74183.6	-74175.7	-74174.9	-74163	-98873.4	-98860.8	-98860.7	-98859	-98858.9	-98852.7	-98852.9	-98839.5	-98094.4	-98085.5	-98082.6	-98075.9	-98057.8	-122779	-122772	-122773	-122770	-122766	-122766	-122766	-122766	-122763	-122750	-122752	-122749	-122740	-122734
wB97M-D3(BJ)	-49517.1	-49511.6	-74224.3	-74216.3	-74214.1	-74203.7	-98928	-98915.4	-98914.9	-98913.5	-98913.4	-98906.5	-98905.9	-98893	-98152	-98141.8	-98140.2	-98133.6	-98114.4	-122851	-122844	-122841	-122841	-122836	-122835	-122835	-122835	-122832	-122820	-122821	-122818	-122810	-122802
wB97M-D4	-49515.5	-49509.9	-74221.8	-74213.7	-74211.5	-74201.2	-98924.7	-98912	-98911.8	-98910.3	-98910.1	-98903.1	-98902.5	-98889.5	-98149.2	-98139	-98137.4	-98131.2	-98111.5	-122847	-122840	-122838	-122838	-122833	-122831	-122831	-122831	-122828	-122816	-122817	-122815	-122807	-122798
wB97M-V	-49473	-49467.3	-74158.4	-74150.7	-74148.6	-74137.8	-98840.5	-98828.2	-98827.8	-98826	-98825.9	-98819.4	-98818.9	-98805.9	-98070.1	-98060.7	-98058.3	-98052.2	-98033	-122747	-122740	-122739	-122738	-122733	-122733	-122733	-122732	-122730	-122717	-122719	-122716	-122707	-122700
MN15-D3(BJ)	-49464.1	-49457.5	-74143.5	-74136.4	-74135.4	-74122.5	-98819.8	-98808.4	-98808.2	-98805.5	-98805.2	-98800.3	-98800.1	-98787.1	-98046.8	-98038.2	-98034.7	-98030	-98011.1	-122719	-122712	-122712	-122709	-122706	-122704	-122704	-122703	-122702	-122689	-122691	-122688	-122680	-122674
TPSS0-D3(BJ)	-49508.7	-49503.3	-74210.6	-74204	-74202.6	-74189.8	-98908.5	-98897.5	-98896	-98894.7	-98894.1	-98889.1	-98888.8	-98782	-98128.5	-98030.8	-98116.5	-98108	-98003.1	-122822	-122815	-122814	-122813	-122808	-122807	-122807	-122807	-122805	-122792	-122794	-122789	-122783	-122776
TPSS0-D4	-49507.6	-49502.1	-74208.9	-74202.3	-74200.9	-74188.1	-98906.2	-98895.2	-98893.9	-98892.5	-98891.9	-98886.7	-98886.5	-98860.2	-98126.6	-98107.9	-98114.6	-98106.3	-98078.8	-122819	-122813	-122812	-122810	-122806	-122805	-122805	-122805	-122803	-122790	-122791	-122787	-122780	-122774
TPSS0-NL	-49460.4	-49454.7	-74138.7	-74132.6	-74131.4	-74117.9	-98813.2	-98802.7	-98801.2	-98799.4	-98798.8	-98794.5	-98794.3	-98869.3	-98038.8	-98113.9	-98026.8	-98018.5	-98086	-122709	-122702	-122703	-122700	-122696	-122696	-122696	-122696	-122694	-122680	-122682	-122678	-122670	-122665
DSD-PBEP86-D3(BJ)	-49410.6	-49404	-74063.5	-74057.2	-74055.6	-74043.1	-98714	-98703.2	-98702.5	-98700.2	-98699.5	-98694.9	-98694.7	-98681.7	-97940.5	-97931.4	-97929.7	-97921.9	-97903.8	-122586	-122580	-122578	-122578	-122573	-122572	-122572	-122571	-122569	-122557	-122558	-122554	-122547	-122539
DSD-PBEP86-D4	-49409.8	-49403.2	-74062.1	-74055.7	-74054.1	-74041.7	-98711.8	-98701	-98700.6	-98698	-98697.5	-98692.7	-98692.5	-98679.4	-97938.6	-97929.5	-97927.7	-97920.2	-97901.8	-122584	-122577	-122576	-122575	-122570	-122569	-122569	-122568	-122567	-122554	-122555	-122552	-122544	-122536
DSD-PBEP86-NL	-49395.4	-49388.7	-74040.7	-74034.3	-74032.7	-74020.2	-98683.5	-98672.7	-98672.2	-98669.6	-98669	-98664.4	-98664.3	-98651.2	-97906.1	-97902.9	-97895.3	-97893.4	-97875.2	-122550	-122544	-122542	-122541	-122537	-122536	-122536	-122535	-122533	-122521	-122521	-122518	-122511	-122503
PWPB95-D3(BJ)	-49465.3	-49458.9	-74145	-74138.4	-74136.9	-74124.3	-98821.4	-98810.5	-98809.9	-98807.6	-98807.1	-98802.2	-98801.9	-98789	-98049	-98040	-98037.6	-98030.6	-98012.5	-122721	-122715	-122713	-122712	-122708	-122706	-122706	-122705	-122704	-122691	-122692	-122689	-122682	-122674
PWPB95-D4	-49465.8	-49459.3	-74145.9	-74139.5	-74138	-74125.3	-98823	-98812.1	-98811.4	-98809.1	-98808.6	-98803.8	-98803.6	-98790.8	-98050.2	-98041.3	-98038.9	-98031.7	-98013.9	-122723	-122716	-122715	-122714	-122710	-122708	-122708	-122707	-122706	-122693	-122695	-122691	-122684	-122676
PWPB95-NL	-49447.4	-49440.9	-74118.3	-74111.9	-74110.4	-74097.6	-98786	-98775.2	-98774.6	-98772.2	-98771.7	-98767	-98766.8	-98753.9	-98015.6	-98006.9	-98004.3	-97997.2	-97979.4	-122679	-122673	-122672	-122670	-122666	-122665	-122665	-122664	-122662	-122650	-122651	-122647	-122640	-122633
wB97X-2-D3(BJ)	-49372.9	-49366.5	-74006.8	-74000.8	-73998.7	-73986.5	-98638.3	-98627.8	-98626.8	-98624.6	-98623.9	-98539.6	-98618.9	-98605.8	-97874.2	-97865.4	-97863.3	-97856	-97837.5	-122501	-122495	-122493	-122492	-122488	-122487	-122486	-122486	-122484	-122472	-122472	-122469	-122461	-122453

## Sheet: Absolute Deviations
ABSOLUTE DEVIATIONS
	AD < 0.5 kcal/mol	0.5 - 1.0 kcal/mol	1.0 - 1.5 kcal/mol	AD > 1.5 kcal/mol	AD > 1.0 kcal/mol	1A-1B	2B-2A	2C-2A	2D-2A	3B-3A	3C-3A	3D-3A	3E-3A	3F-3A	3G-3A	3H-3A	4B - 4A	4C-4A	4D-4A	4E - 4A	5B - 5A	5C - 5A	5D - 5A	5E - 5A	5F - 5A	5G - 5A	5H - 5A	5I - 5A	5J - 5A	5K- 5A	5L - 5A	5M - 5A	5N - 5A		MAD
SVWN5	3	3	5	17	22	0.299734	1.6828	1.60945	2.62891	1.95356	1.17526	1.894	0.937918	0.247006	0.621743	0.690069	1.10481	4.10366	3.95478	3.53325	1.10701	3.15269	1.40689	0.241337	1.88912	1.9839	2.71519	1.27823	5.36048	4.66562	4.71668	2.42661	7.42929		2.31464
Xalpha	6	3	6	13	19	0.503751	2.39032	0.322439	2.51483	2.39598	1.21748	1.73718	0.74936	1.21595	0.509469	1.91936	0.0873774	4.12769	3.75997	2.36253	1.01615	1.32377	1.33602	1.02184	0.161443	0.152173	0.421773	0.572095	3.87633	2.55583	3.12544	1.56561	5.08831		1.71537
BLYP	2	3	0	23	23	3.67941	4.73877	7.36781	0.860882	3.39244	2.50314	0.64096	0.921516	6.16641	7.7593	6.25561	5.92339	2.84174	2.97998	6.36851	0.138095	11.1497	0.240072	5.21926	10.6152	11.2545	10.5029	11.3521	6.31499	11.2953	10.26	4.97898	10.5396		5.93788
HCTH/407	3	2	5	18	23	1.91804	3.40046	1.17817	1.45741	3.12992	0.916194	0.142666	0.679291	2.39505	1.61049	5.209	1.72023	3.38359	1.21034	3.87425	0.0871369	1.39493	0.0810365	2.1119	5.94114	5.96156	4.3217	2.18471	3.81435	3.58192	1.81903	1.99432	1.07324		2.37829
N12	8	3	8	9	17	2.74581	1.66166	1.75075	1.35584	1.33848	1.74691	0.0784865	0.413687	1.55704	2.28184	1.57669	1.44673	3.14281	0.857499	1.39617	0.310615	1.47029	0.270246	1.34978	1.237	1.2066	0.359845	2.12478	0.711447	0.118256	0.823474	0.36635	0.135357		1.20837
N12-D3	3	12	5	8	13	2.88805	1.48246	1.82656	1.1305	1.2236	2.45212	0.215267	0.0745294	1.52514	2.49882	1.17796	0.967246	2.7041	1.57608	0.873441	0.700871	1.29052	0.611886	0.998379	0.665181	0.646874	0.865186	1.8675	0.696488	0.621326	0.687167	0.635401	0.415922		1.04
PBE	7	3	6	12	18	1.78451	2.14333	1.41382	1.45484	1.73027	1.18251	0.0962472	0.333909	1.77105	1.9612	2.29717	1.27831	3.22496	0.854147	0.891086	0.197398	1.81177	0.257515	1.46385	2.69825	2.85513	1.86326	2.47095	0.113136	1.11156	0.942458	0.166067	0.444615		1.38619
PBE-D3BJ	7	2	6	13	19	1.87988	2.05783	1.32362	1.4293	1.71233	1.69294	0.310652	0.0349314	1.7218	1.94718	2.08922	1.17259	2.99382	0.383529	0.576913	0.330927	1.85817	0.387992	1.48824	2.49461	2.67618	1.72689	2.4718	0.257909	1.00944	1.11529	0.256135	0.55039		1.35537
PBE-D4	6	3	6	13	19	1.8326	2.1166	1.38078	1.44587	1.75975	1.60944	0.304972	0.0542185	1.7981	1.98181	2.21683	1.20152	3.00896	0.517256	0.646512	0.277638	1.83327	0.345938	1.48602	2.55151	2.74511	1.78779	2.49494	0.146352	1.03674	1.0769	0.20223	0.51124		1.37039
PBE-NL	12	4	9	3	12	1.67599	1.68697	0.8239	1.43367	1.35524	1.42007	0.352571	0.00519249	1.22022	1.36547	1.48067	0.483195	2.99798	0.545581	0.00125768	0.352692	0.525467	0.439787	0.788739	1.17504	1.30299	0.397434	1.2144	0.961642	0.480259	0.206038	0.2964	2.02492		0.964778
RPBE	3	4	1	20	21	2.3692	2.56345	2.6709	0.969932	1.82965	1.07153	0.644396	0.93822	2.47903	2.97359	3.11015	2.31382	2.95613	0.0212068	2.56525	0.196621	3.60941	0.224975	1.97611	4.50979	4.76795	3.65766	3.87007	2.29443	3.22614	2.73043	0.883133	2.11037		2.26905
revPBE	3	3	3	19	22	2.26205	2.46579	2.38167	1.06689	1.80286	1.03169	0.534375	0.865952	2.31423	2.74343	2.92642	2.07899	3.0425	0.374485	2.17536	0.139318	3.19744	0.159834	1.83069	4.07684	4.30839	3.20365	3.52892	1.80687	2.72351	2.29146	0.603038	1.49097		2.05099
rPW86PBE	3	1	1	23	24	2.9969	3.63893	4.82828	1.07195	2.78062	2.13919	0.298852	0.570134	4.38635	5.37504	5.37411	3.86765	2.86364	1.74257	5.10266	0.0586217	7.55566	0.0289202	3.77422	8.51371	8.94846	7.98349	7.80785	4.84608	8.30472	7.66103	4.27545	6.91527		4.41823
XLYP	2	3	0	23	23	3.90843	4.96972	8.01762	0.756326	3.5179	2.68735	0.74784	0.9788	6.61064	8.37851	6.66029	6.41627	2.73604	3.62005	7.06376	0.180937	12.1614	0.302455	5.60439	11.4937	12.1868	11.4478	12.2747	7.10986	12.4348	11.348	5.61183	11.8276		6.46621
B97M-D3BJ	0	1	3	24	27	3.28995	4.776	4.08428	1.93069	4.42294	4.10031	1.47848	0.997889	5.28184	5.27902	6.77442	3.81802	2.77383	3.16454	6.05221	1.20331	4.71341	1.13708	4.59261	6.58072	6.94388	5.90713	5.83808	6.15849	6.67823	5.96299	6.29735	6.04702		4.51017
B97M-D4	0	1	3	24	27	3.13166	4.92348	4.27033	1.90035	4.43032	3.63156	1.33594	0.816596	5.3532	5.34132	7.11247	3.78915	2.91815	2.56179	6.38556	1.09442	4.66196	1.0643	4.32219	6.87456	7.2273	6.13039	5.79901	6.59165	6.86303	5.72868	6.31138	6.20952		4.52787
B97M-V	0	1	3	24	27	2.92196	4.51421	3.72808	1.8947	4.01694	3.24974	1.30301	0.775134	4.7704	4.71132	6.44779	3.08873	2.98563	2.35319	5.84643	1.11988	3.33778	1.12815	3.58212	5.60682	5.88012	4.81945	4.5095	5.91164	5.39811	4.35673	5.78191	4.73564		3.88483
M06L	2	3	4	19	23	2.65513	2.41052	1.0576	2.01989	4.45594	2.40667	7.8309	0.736497	3.66638	5.06781	10.6647	0.0880487	3.23129	2.31263	3.63507	1.00469	0.605567	0.891686	1.50023	4.54759	4.34462	3.44773	0.423442	5.37136	2.00875	2.51132	4.13528	1.0144		3.00164
M11L	1	1	3	23	26	4.52018	8.8354	5.68002	1.19169	7.57971	4.03895	1.92547	0.440166	8.12029	6.57092	7.13742	5.67308	2.95454	0.740548	4.23493	1.38048	6.17737	1.23455	5.62378	6.10839	7.03807	6.53463	7.67764	4.68394	7.63628	3.27832	4.15173	4.65414		4.85081
MN12L	0	2	3	23	26	2.49579	4.80405	3.51716	1.74966	3.73014	2.37775	1.49777	0.726909	4.62338	4.47147	4.37677	3.43542	3.09676	0.821465	2.73225	1.28427	4.14345	1.24611	3.45741	4.62977	5.06058	4.46553	5.19312	3.62652	5.0419	3.07417	3.13064	2.72761		3.26921
MN15L	1	9	6	12	18	0.976199	2.898	0.941497	1.85918	1.90991	1.0251	1.00694	0.581632	1.8593	1.44973	2.7961	1.18955	2.91075	0.582573	2.14735	0.997024	0.700372	1.10317	1.08119	2.14539	2.33985	1.62592	0.0936863	3.29511	0.635492	0.853457	2.24683	0.915633		1.50596
PKZB	10	6	5	7	12	1.5118	1.2141	0.818709	1.1341	0.599742	0.824982	0.237503	0.398119	0.682186	1.06505	1.91749	0.108575	2.65275	0.17567	1.56942	0.212281	0.498295	0.148806	0.0112928	1.92224	2.00479	1.12421	0.280975	1.99274	0.535941	0.207529	0.567241	1.26375		0.917154
PKZB-D3(0)	7	9	9	3	12	1.70087	1.12233	0.900734	0.863429	0.351299	1.36088	0.0597704	0.166271	0.549988	1.10449	1.39652	0.423567	2.24294	0.476177	1.04005	0.541986	0.802039	0.437689	0.509528	1.13042	1.2304	0.461183	0.653336	1.38314	1.20999	0.579462	0.693069	1.68575		0.9
revTPSS	7	6	3	12	15	1.23618	1.66511	0.570465	0.764424	2.2169	0.0425408	1.48414	0.776946	1.90212	0.679058	1.55143	1.58471	2.14161	2.57498	0.726268	0.159409	1.55031	0.2206	1.64899	0.252079	0.354192	1.24136	2.55358	0.684306	2.27747	0.331971	0.199858	2.97898		1.2275
revTPSS-D3BJ	6	7	4	11	15	1.33396	1.80472	0.657505	0.731148	2.24698	0.752671	1.1017	0.29418	1.91869	0.620808	2.10883	1.63462	1.79201	3.46177	0.074124	0.0289989	1.27646	0.0189098	1.52236	0.67284	0.720413	1.47153	2.31223	0.183195	2.39132	0.628706	0.172483	3.19868		1.25471
revTPSS-D4	6	7	4	11	15	1.27585	1.74445	0.599903	0.750405	2.2049	0.617691	1.13136	0.343671	1.84943	0.593717	1.97102	1.5971	1.83476	3.28855	0.172602	0.035926	1.3107	0.0689362	1.52936	0.603606	0.641366	1.40489	2.29829	0.0410489	2.36167	0.569663	0.233093	3.15556		1.22248
revTPSS-NL	4	3	6	15	21	1.06338	2.34888	1.38971	0.74002	2.75815	0.448138	1.01736	0.216973	2.64997	1.44805	3.00497	2.58891	1.77417	3.32521	0.767009	0.0910296	3.07065	0.0767214	2.45582	2.49454	2.61233	3.29667	4.0196	1.22523	4.42928	1.11137	0.890731	5.22255		2.01919
RSCAN	1	1	4	22	26	1.96631	2.76562	2.06563	2.2467	2.69369	2.6126	1.34057	0.880295	3.19926	3.2986	4.45184	1.46516	3.45854	0.0730462	2.60536	1.21683	2.14863	1.25972	2.18118	3.80613	4.00992	2.98755	3.32353	1.68207	3.28101	3.29389	2.74732	1.83795		2.46068
R2SCAN	1	1	4	22	26	2.09475	2.62897	2.15156	2.06626	2.42431	2.55224	1.08371	0.697343	3.05064	3.25022	4.13907	1.37425	3.29236	0.320986	2.66389	1.15287	2.10351	1.14227	1.93353	3.51095	3.7681	2.76874	3.04486	1.7317	3.22055	3.3811	2.65071	1.72397		2.35441
SCAN	1	4	1	22	23	1.74181	2.10251	2.17345	1.77427	1.82851	2.16298	0.831054	0.446411	2.51286	3.06298	2.32909	1.63103	2.94402	1.93331	2.00963	0.978491	2.181	0.951826	1.75314	2.14827	2.28038	1.55058	2.99326	1.34231	1.64839	1.89875	1.87398	0.620596		1.8466
TPSS	5	8	2	13	15	2.11328	0.501207	1.43332	0.878344	0.193274	0.870645	1.03491	0.773428	0.648135	1.64793	0.524894	0.818488	2.48596	2.03174	1.72634	0.149803	2.20669	0.203782	0.618555	3.01331	3.12786	2.36965	1.75625	1.63331	1.82682	3.15387	0.609161	0.333406		1.38158
tHCTH	3	2	2	21	23	2.67111	3.38654	2.82203	1.04932	2.72429	1.36256	0.449159	0.804524	3.19391	3.23932	4.39409	2.56758	2.96176	0.558557	3.76354	0.0296572	4.15839	0.0989146	2.60126	6.08097	6.36244	5.0652	4.52535	3.33733	5.29474	4.12942	2.20218	2.78862		2.95081
APFD	10	9	6	3	9	1.44986	1.51894	0.334408	1.12632	1.329	1.07056	0.27805	0.109383	1.01806	0.839138	1.12167	0.308848	2.63062	0.153127	0.800339	0.691892	0.317523	0.782456	0.663822	0.00430191	0.0412196	0.874493	0.220194	0.578669	0.862807	0.960627	0.481532	2.09673		0.809449
B1B95	10	9	4	5	9	0.64827	0.682351	0.523606	1.33395	0.69195	0.329681	0.163306	0.137786	0.135569	0.113036	1.0469	0.42607	2.6743	1.51563	0.633469	0.534078	1.61282	0.617985	0.00155639	0.0519563	0.118009	0.820745	1.11348	0.713237	1.58708	1.34551	0.0790866	2.93279		0.806579
B3LYP	3	2	0	23	23	2.89752	4.19125	5.7455	0.932358	3.2702	2.20562	0.14005	0.525069	5.30186	6.1937	5.428	4.78913	2.54301	2.84435	5.81001	0.314264	8.1577	0.251338	4.45533	7.72672	8.18326	7.41313	8.66344	5.7518	8.73461	7.57862	4.71578	7.95419		4.73992
B97	3	2	0	23	23	2.45207	2.68358	3.95764	0.838953	1.94761	1.62202	0.276779	0.581054	3.37313	4.3719	2.87782	3.1019	2.4507	1.66963	3.14195	0.194503	4.72659	0.165513	2.52333	3.45361	3.73892	2.81335	5.1902	3.02104	3.63032	3.31075	1.93406	3.99113		2.64429
B98	4	1	0	23	23	2.63939	2.94845	4.83251	0.818484	2.09692	1.9425	0.182173	0.480069	4.01596	5.29984	2.99226	3.69978	2.36555	2.3685	3.39658	0.274086	5.9444	0.249621	2.98455	3.77664	4.14157	3.35638	6.44843	3.20913	4.51745	4.23849	2.36949	5.1738		3.09868
BB1K	5	7	6	10	16	1.62671	1.44728	1.23245	1.39333	0.953721	0.788919	0.316268	0.56193	1.11833	1.64608	2.08389	0.771362	3.25561	1.67601	0.914648	0.0621168	1.64528	0.0943868	0.843428	3.34298	3.38724	2.6215	1.88888	0.881415	1.06531	1.4479	0.156542	0.438082		1.34506
BHandHLYP	2	4	0	23	23	2.73983	4.43706	5.42736	0.691847	3.69442	2.3526	0.224366	0.239941	5.57722	5.91336	5.35561	4.72242	2.10622	4.10054	6.62253	0.799508	6.60604	0.767351	4.50138	5.56935	5.98608	5.15452	7.35222	6.61603	7.80509	6.13304	5.64328	7.16345		4.43938
CAMB3LYP	1	4	1	22	23	2.09084	3.76603	4.19477	1.00219	3.37088	2.11654	0.527735	0.0857217	4.47984	4.75053	4.75884	3.26168	2.37869	1.35312	4.18699	0.838563	4.7033	0.826298	3.56493	4.57101	4.86126	4.10807	5.56797	4.2269	5.2943	3.99684	3.74792	4.49477		3.32595
HSE06	7	7	8	6	14	1.3081	1.94604	0.647332	1.34945	1.83003	1.03063	0.428239	0.0451569	1.54502	1.1876	2.19023	0.82042	2.74454	0.219933	1.59806	0.612964	0.136694	0.68329	1.24529	1.05847	1.09897	0.103563	0.983641	0.991199	0.311532	0.138194	0.996743	1.13813		1.01391
LC-wHPBE	3	3	4	18	22	0.361263	0.848072	1.9635	1.05752	1.81333	0.40107	1.93993	0.907208	1.18557	3.21018	0.159773	3.73862	2.3874	6.17327	3.91891	1.17237	6.164	1.22558	0.96029	4.62978	4.88477	6.09549	5.1307	4.43983	10.2728	6.62959	3.27346	7.55639		3.3036
LC-PBE	2	5	3	18	21	0.782272	0.599488	4.04653	1.77659	1.59411	0.679607	0.916602	0.161355	0.223002	1.33846	0.898812	2.2942	2.87826	4.06742	1.4859	1.78207	9.87936	2.01415	1.75882	8.07163	8.52019	9.58205	8.03263	1.47563	6.26907	10.8333	1.57935	12.1376		3.77423
MN12SX	1	6	3	18	21	1.86187	3.30496	2.07381	0.687404	2.62706	1.26897	0.666669	0.00561747	2.81996	2.49438	2.56826	2.08943	2.26348	1.43496	1.61207	0.912026	2.01067	0.791557	1.95982	2.67033	2.85642	2.12833	2.64194	2.49595	2.44397	0.700577	1.36553	0.628544		1.83516
MPW1B95	8	11	4	5	9	0.53461	0.622234	0.692571	1.35679	0.688575	0.39345	0.305663	0.000964483	0.0615104	0.268122	0.920101	0.554545	2.60756	1.31342	0.548925	0.641324	1.96262	0.747137	0.052605	0.347852	0.533779	1.20486	1.39042	0.574358	1.90121	1.64788	0.163626	1.7996		0.851297
MPW1PW91	7	9	6	6	12	1.44237	1.92503	0.959692	1.24894	1.75883	1.04297	0.272811	0.172227	1.68564	1.48674	1.99979	0.993232	2.66921	0.0451904	1.56864	0.535222	0.4898	0.577745	1.25902	0.85884	0.922559	0.0609247	1.24774	0.962859	0.365224	0.0066812	0.762538	0.896175		1.00774
MPWB1K	8	8	3	9	12	0.305597	0.481332	1.24667	1.29578	0.723162	0.306978	0.501224	0.15401	0.152824	0.796674	0.590236	0.931724	2.40131	1.1443	0.509281	0.837336	3.22026	0.990389	0.303845	1.76859	2.01555	2.70863	2.53186	0.545505	2.93349	2.82463	0.196215	5.70421		1.36149
N12SX	8	9	7	4	11	2.01146	1.4198	0.48887	1.2251	1.39229	1.50443	0.325791	0.113244	1.22873	1.07298	0.969862	0.559774	2.73486	0.480111	0.630332	0.633318	0.324706	0.655964	0.862357	0.920225	0.93871	2.19453	0.473887	0.255022	1.35065	0.7828	0.0927671	2.57377		1.00773
O3LYP	6	11	5	6	11	1.14183	2.18037	0.203991	1.74969	2.10563	0.876506	0.499592	0.102956	1.31599	0.755158	2.12349	0.693442	3.30544	1.34496	0.668602	0.518415	0.586947	0.633788	1.14364	0.905475	0.863357	0.267914	0.52009	0.211879	0.726864	1.36204	0.232345	2.4809		1.05433
PBE0	9	9	5	5	10	1.09767	1.62523	0.128385	1.35624	1.58423	0.84739	0.42906	0.0521273	1.09222	0.652372	1.56106	0.38344	2.72287	0.602077	0.85531	0.59899	0.790229	0.68098	0.810592	0.0518496	0.0524029	1.03549	0.0635911	0.193759	0.948404	1.27682	0.218217	2.32828		0.858546
SOGGA11X	10	8	3	7	10	1.03536	1.73721	0.497751	0.826329	1.59515	0.542197	0.0856702	0.295062	1.35336	0.817982	1.72826	0.954088	2.11892	0.722378	2.43776	0.504843	0.270832	0.553776	1.19687	0.445284	0.478255	0.460048	0.240312	2.53695	0.243661	0.672311	1.58465	0.547432		0.94581
wB97X	4	8	6	10	16	1.50163	2.1887	0.915562	0.773968	2.55261	1.66158	0.798915	0.128533	2.03568	1.58241	3.45877	0.255786	2.03516	0.660626	2.26948	1.08698	1.05009	1.01597	1.28851	0.60388	0.556228	0.725064	0.208869	2.91354	0.258749	1.13596	2.28969	0.695612		1.30888
wB97X-D3BJ	6	9	1	12	13	1.73187	2.08973	1.32186	0.540856	2.26265	2.22081	0.658051	0.206924	2.16085	1.90679	2.3851	0.73163	1.5081	0.685801	1.54619	0.954967	0.0423825	0.862442	1.58949	0.133781	0.290882	0.61209	0.569214	1.79745	0.156987	0.163456	1.60694	0.599927		1.11919
wB97X-D4	4	8	5	11	16	1.50748	2.19539	0.922302	0.773828	2.56458	1.70336	0.81478	0.152224	2.04973	1.59545	3.46893	0.267502	2.01933	0.62719	2.22669	1.09115	1.01504	1.02436	1.31055	0.628287	0.585368	0.693671	0.173778	2.91107	0.22813	1.09342	2.30535	0.663415		1.30758
wB97X-V	3	8	8	9	17	1.40041	1.75398	0.866162	0.520314	1.83574	1.50982	0.529561	0.0429057	1.59092	1.27412	1.90728	0.00838688	1.67257	0.084121	1.19923	0.898529	1.39176	0.874293	0.651985	1.02207	0.94846	1.85346	0.819083	1.37273	1.278	1.75767	1.03934	2.0473		1.14822
wB97M-D3BJ	2	5	4	17	21	1.50449	1.82434	2.34945	0.566372	1.82999	1.9346	0.578912	0.146926	2.41571	2.88227	2.98408	1.26844	1.72489	0.0251376	2.14398	0.980953	1.77017	0.961919	1.7507	1.51795	1.61773	0.979	2.26152	2.48015	1.41875	1.29644	2.33263	1.70876		1.61629
wB97M-D4	2	4	5	17	22	1.43885	1.95953	2.49868	0.571754	1.92316	1.75831	0.553378	0.0893588	2.58351	2.97996	3.25846	1.31282	1.76347	0.32345	2.30384	0.884971	1.73032	0.889693	1.69796	1.66754	1.77013	1.10879	2.29468	2.75781	1.48011	1.17354	2.24074	1.80367		1.67209
wB97M-V	9	6	2	11	13	1.25103	1.56453	1.97178	0.562569	1.55248	1.52987	0.604269	0.144977	2.05695	2.38798	2.59341	0.58243	1.72787	0.404256	1.68374	0.930609	0.419902	0.957854	0.98073	0.348441	0.387837	0.220483	1.04309	1.99137	0.00696397	0.135602	1.71124	0.311394		1.0737
X3LYP	4	1	0	23	23	2.80595	4.17015	5.64784	0.949587	3.2743	2.2217	0.0486007	0.445764	5.26039	6.09257	5.35662	4.72796	2.51281	2.92524	5.73344	0.380282	7.95597	0.335282	4.43895	7.50454	7.9547	7.22102	8.51527	5.64404	8.54311	7.36851	4.74543	7.76954		4.66248
BMK	8	7	1	12	13	1.97084	0.341331	1.51226	0.767903	0.590668	1.57615	0.0829889	0.173976	0.119973	2.01579	0.0394993	0.0313821	2.10001	0.261866	0.544041	0.647871	1.73488	0.616039	0.924802	3.01424	3.30067	4.67823	1.09672	1.58558	4.50074	2.38798	0.0456177	0.514544		1.32773
M05	3	7	2	16	18	2.98725	0.0441692	0.903015	0.848274	0.741615	2.21236	0.0597007	0.411606	0.770844	0.545412	4.78368	3.15512	2.54209	2.79212	3.88675	0.662167	6.49409	0.542477	1.62002	1.04568	1.44318	3.32714	5.9699	4.8734	4.25904	2.0842	2.65866	3.47759		2.32648
M06	3	4	5	16	21	3.17238	1.92556	2.54701	1.0682	1.97302	3.34198	1.10774	0.409978	2.38517	3.35054	5.15369	0.0356781	2.20907	0.948525	4.09615	1.0523	0.0672442	0.922314	1.27963	2.41121	2.4743	1.78072	0.862359	5.36173	1.35659	2.83101	4.67433	0.692148		2.12466
M062X	9	7	5	7	12	0.814629	0.44239	0.766727	0.427708	0.000968248	0.396115	0.178342	0.0286785	0.576919	0.506091	1.77093	2.06798	1.82009	3.14782	1.17296	0.975622	2.72297	0.882472	1.01534	0.363473	0.0839443	0.782195	2.50001	1.14164	1.05669	0.211326	1.2916	2.00255		1.04101
M08HX	7	8	8	5	13	1.84298	0.973499	0.709515	0.610699	1.40129	1.47389	0.864525	0.297031	1.42241	1.38243	2.63968	0.833244	2.065	3.00234	0.638405	1.23216	1.55171	1.16749	0.0690357	0.487896	0.471823	0.103361	0.877594	0.581398	0.467316	0.289251	1.15827	1.3944		1.07174
MN15	10	12	3	3	6	0.312141	0.945289	0.251826	1.02907	0.718488	0.492034	0.46441	0.21793	0.534452	0.5786	0.73518	0.223439	2.05296	1.56404	0.305865	0.769932	0.644649	0.886608	0.28842	0.630465	0.625973	0.270001	0.298109	1.1051	0.861073	1.12733	0.790481	2.77199		0.767709
MN15-D3(BJ)	10	12	3	3	6	0.312157	0.945314	0.251853	1.02907	0.718517	0.492068	0.464412	0.217932	0.534487	0.578635	0.735216	0.220873	2.05517	1.56182	0.30811	0.769576	0.644863	0.889382	0.288821	0.629981	0.626173	0.269803	0.298427	1.10533	0.860166	1.12722	0.790202	2.77206		0.77
PW6B95	4	10	8	6	14	1.09104	1.18805	0.863246	1.20379	1.00513	0.831731	0.0974812	0.126207	1.13725	1.27621	1.87556	0.599103	2.49568	0.113149	1.94753	0.53123	0.584027	0.586194	0.867821	1.81644	1.76067	1.13187	0.978641	2.12545	0.792539	0.983551	1.48245	0.281101		1.06333
revPBE0	9	7	6	6	12	1.48669	1.89038	0.876269	1.04287	1.64405	0.735743	0.0584266	0.469172	1.50885	1.25117	2.02161	0.988111	2.59025	0.252254	1.79962	0.333831	0.246068	0.357419	1.07843	0.957638	1.01757	0.0539742	0.848101	1.44051	0.241117	0.300531	0.519127	0.910836		0.96145
revTPSS0	5	7	8	8	16	0.890115	0.898769	0.737412	0.704794	1.17535	0.0722434	0.799924	0.468868	1.20782	0.739992	0.970271	1.31959	1.88572	2.32403	1.1398	0.263089	2.42997	0.247669	1.18491	1.50156	1.64664	2.48024	2.85801	1.08844	2.59349	1.04309	0.326354	3.35497		1.29833
revTPSSh	11	2	8	7	15	1.12703	1.2954	0.403987	0.708851	1.77062	0.0824956	1.23053	0.664903	1.48009	0.492724	0.0867454	0.0315683	1.98665	2.67193	1.07913	2.91792e-06	1.50877	0.0505461	1.3238	0.373646	0.477679	1.30771	2.31067	1.14387	1.94674	0.20955	0.250608	2.62424		1.02288
SCAN0	5	7	7	9	16	1.0214	1.56398	0.812444	1.63081	1.65156	1.46756	0.941171	0.535913	1.65459	1.58517	1.92476	0.615026	2.61912	1.1057	1.8445	1.14651	0.199931	1.22307	1.0704	0.306395	0.281321	0.516294	0.772294	1.27561	0.0468684	0.0550773	1.68517	0.893776		1.08737
TPSS0	17	5	3	3	6	1.4306	0.559604	0.293218	0.878283	0.275621	0.642382	0.396304	0.409432	0.416704	0.583346	0.266676	0.08233	2.21763	1.52237	1.21518	0.31192	0.342486	0.316798	0.2719	0.315308	0.293392	0.504091	0.291094	1.34366	0.303169	0.366439	0.533781	1.71013		0.646208
TPSS0-D3BJ	15	8	1	4	5	1.55553	0.455525	0.183273	0.847611	0.263355	1.30964	0.110828	0.0195517	0.369479	0.574768	0.765916	0.890236	1.90953	2.12999	0.313029	0.482694	0.276329	0.476776	0.316264	0.0597061	0.0705065	0.670171	0.273383	0.868949	0.428483	0.604443	0.645764	1.83796		0.668203
TPSS0-D4	13	6	6	3	9	1.48579	0.537219	0.265029	0.868056	0.316822	1.13514	0.156305	0.0858566	0.458181	0.617318	1.17451	1.31496	1.96807	1.90524	1.12597	0.401655	0.300536	0.418042	0.302284	0.170453	0.191167	0.567808	0.245934	1.05964	0.36565	0.533963	0.58245	1.76468		0.725668
TPSS0-NL	10	6	3	9	12	1.26096	0.0739016	0.528467	0.855366	0.24933	0.902931	0.0736747	0.0030639	0.35961	0.250507	0.343499	0.163449	1.92927	1.90867	1.48665	0.514973	2.03913	0.548927	0.618178	1.67421	1.7389	2.4196	1.95288	0.0841607	1.51819	1.13572	0.0788598	3.79969		1.01831
TPSSh	7	10	3	8	11	1.79247	0.476556	0.923154	0.881284	0.0403301	0.743474	0.775069	0.624793	0.50054	1.15927	0.410203	0.517438	2.35971	1.80903	1.60404	0.0356599	1.1384	0.00392268	0.450387	1.91378	1.96479	1.20164	0.885924	1.50832	0.937028	2.01335	0.556506	0.51265		0.990704
tHCTHhyb	4	1	0	23	23	2.48871	2.60346	3.73469	0.940856	1.92094	1.77861	0.129511	0.424256	3.18559	4.23657	2.96575	2.7725	2.49362	1.75012	3.0553	0.295428	4.41261	0.240676	2.36218	3.53831	3.8248	2.85512	4.8917	2.65943	3.58045	3.399	2.15411	3.70235		2.58559
B2CN-PLYP	7	1	3	17	20	1.43354	2.83492	3.01355	0.424196	2.45166	1.38363	0.141228	0.261476	3.42988	3.4473	1.70324	2.78814	0.000728066	2.74869	0.454972	0.232604	4.33452	0.0343575	2.6828	2.28584	2.68984	2.34499	4.64509	1.2782	3.75658	2.01659	0.89139	3.01322		2.02583
B2GP-PLYP	4	2	5	17	22	1.13461	1.4658	2.1575	0.574974	1.04021	0.882909	0.0725667	0.106218	1.85961	2.25081	2.38907	1.87601	1.20106	1.2325	3.52524	0.208259	2.97223	0.221041	1.71956	3.14127	3.28917	2.89994	3.14569	3.15927	3.73078	3.53488	2.84366	3.59289		2.00813
B2PLYP	4	1	3	20	23	1.57749	2.06181	3.11103	0.612819	1.46275	1.18047	0.182386	0.256319	2.64305	3.25296	3.08283	2.67087	1.42445	1.63241	4.07234	0.129402	4.60302	0.103885	2.41531	4.6193	4.86416	4.40295	4.7685	3.79075	5.27274	4.90006	3.28913	5.01918		2.76437
DOD-SCAN	4	4	1	19	20	2.31819	3.52379	5.1703	0.593618	2.54125	0.401082	0.0679737	0.774295	4.61575	0.511341	3.89351	4.18334	0.514421	3.92881	6.51834	0.289052	5.42565	0.178972	3.35767	3.99149	4.37857	1.03693	5.38751	7.14922	6.66188	4.71761	4.9785	6.84125		3.35537
DSD-PBEB95	10	7	7	4	11	0.208732	0.550929	1.19684	0.56174	0.520622	0.400284	0.0703153	0.0381611	1.07971	1.25619	0.391782	0.983151	0.976443	1.1109	0.4307	0.164788	2.17478	0.216644	0.786862	0.946183	1.14106	1.35458	2.15488	0.342165	1.90203	1.45382	0.0139923	2.3657		0.885499
DSD-PBEP86	20	7	1	0	1	0.125887	0.00527395	0.349769	0.558821	0.0800729	0.00972502	0.0260519	0.0323781	0.303795	0.368135	0.28185	0.207525	0.919168	0.457739	1.08021	0.156494	0.807906	0.216563	0.113822	0.114646	0.175079	0.443291	0.678782	0.580918	0.470318	0.22295	0.622729	0.728685		0.362092
DSD-PBEP86-D3(BJ)	22	5	1	0	1	0.370956	0.697891	0.17495	0.408506	0.0957397	0.313181	0.00751741	0.0427235	0.0987565	0.160906	0.339826	0.207982	0.694952	0.226346	1.22687	0.132502	0.111995	0.140934	0.289125	0.421126	0.423911	0.222074	0.14189	0.86029	0.285482	0.532928	0.876525	0.0215347		0.340265
DSD-PBEP86(D4)	21	5	2	0	2	0.321779	0.87351	0.241242	0.411035	0.109951	0.0969903	0.0840501	0.0726563	0.13332	0.187775	0.47098	0.255372	0.791702	0.000119457	1.38933	0.0737264	0.129489	0.0978062	0.2564	0.571625	0.565736	0.339317	0.167616	1.06052	0.388261	0.473459	0.869396	0.121871		0.376966
DSD-PBEP86-NL	24	3	1	0	1	0.292346	0.174385	0.108643	0.401997	0.00981458	0.109192	0.0415138	0.0186935	0.00164115	0.0446537	0.279339	0.0553659	0.748234	0.0473414	1.19988	0.103507	0.203003	0.131148	0.0705682	0.201074	0.183561	0.0248443	0.156367	0.831615	0.00360619	0.169379	0.752344	0.267401		0.236838
LS1DH-PBE	9	4	5	10	15	0.289157	0.396304	2.01606	0.909551	0.212519	0.183672	0.397434	0.283465	1.30493	1.95305	0.47628	1.4919	1.31685	1.46633	0.0589923	0.516239	3.94661	0.645196	1.07995	2.91625	3.13541	3.65359	3.44859	0.963092	3.575	3.21275	0.382538	4.26062		1.58901
MPW2PLYP	4	1	2	21	23	1.63665	2.25524	3.21963	0.637939	1.67936	1.34049	0.0468436	0.161565	2.87855	3.40645	3.2207	2.7764	1.45774	1.99863	4.25821	0.270667	4.53818	0.261688	2.57626	4.42166	4.67227	4.19259	4.80949	3.95903	5.28158	4.79302	3.56745	5.00253		2.83289
PBE0-2	7	5	3	13	16	0.490086	0.719597	2.22916	0.865814	0.52527	0.369415	0.350057	0.300847	1.65176	2.25212	0.696223	1.7227	1.15514	1.68766	0.169748	0.453488	4.15971	0.58803	1.33905	2.97881	3.22991	3.64092	3.74283	1.1014	3.73827	3.21231	0.475974	4.28974		1.71914
PBE0DH	2	10	7	9	16	1.2393	2.10825	0.60992	1.00514	2.07694	1.0135	0.508509	0.00672314	1.81397	1.10541	2.02671	0.835139	2.29168	0.60089	2.19013	0.868828	0.962062	0.947542	1.18296	0.835838	0.807578	1.82046	0.0168083	1.74771	0.515468	1.39574	1.38806	1.65793		1.19926
PBEQIDH	5	3	3	17	20	1.97787	3.31188	2.4674	0.564459	2.97579	1.5313	0.369583	0.169661	3.5248	2.90891	3.41378	2.34868	2.00243	2.35019	4.41012	0.99929	1.04141	1.03751	2.38786	0.391396	0.588902	0.471386	1.9712	4.30349	2.06313	0.417528	3.30471	1.18855		1.94619
PWPB95	20	5	3	0	3	0.49548	0.368417	0.194533	0.6298	0.169258	0.134475	0.143543	0.225446	0.165136	0.27436	0.39439	0.105894	1.38771	0.0878923	1.119	0.185419	0.0492209	0.181501	0.2039	0.637914	0.570805	0.295176	0.0023262	1.24891	0.09937	0.137351	0.675658	0.918181		0.396467
PWPB95-D3BJ	21	4	3	0	3	0.529372	0.384539	0.212468	0.627248	0.208763	0.324292	0.0653973	0.113196	0.209986	0.319819	0.403915	0.118089	1.30201	0.0608954	1.0588	0.215114	0.0507039	0.217795	0.26061	0.681714	0.625846	0.361204	0.100041	1.19049	0.0255421	0.273114	0.730557	0.847288		0.411386
PWPB95-D4	21	5	2	0	2	0.527082	0.288549	0.0946677	0.625612	0.131648	0.393228	0.0200331	0.0660987	0.0932841	0.204972	0.221175	0.0252261	1.27008	0.174899	0.898002	0.254363	0.12984	0.247248	0.206143	0.394351	0.349636	0.104076	0.0889229	0.980118	0.290995	0.151951	0.658269	1.09616		0.356665
PWPB95-NL	21	5	2	0	2	0.465597	0.218467	0.0117556	0.616935	0.0462037	0.242094	0.0450841	0.0944149	0.00747844	0.0894455	0.128333	0.165854	1.28961	0.046377	0.821526	0.24093	0.470628	0.248478	0.0285834	0.134679	0.0589981	0.186045	0.40944	0.896552	0.619933	0.2269	0.534365	1.43349		0.349221
revDOD-PBEP86	8	10	8	2	10	0.542836	0.68503	1.02316	0.108511	0.365705	0.00522846	0.333499	0.369206	0.701675	0.878976	0.445492	0.867207	0.572115	0.688909	1.72946	0.0767961	1.2094	0.136953	0.70112	1.14058	1.18561	1.03913	1.08975	1.69205	1.27706	0.986412	1.0234	0.932585		0.778852
revDSD-PBEP86	8	12	6	2	8	0.508342	0.609413	0.889953	0.192294	0.31059	0.022119	0.286514	0.309789	0.599194	0.765871	0.543954	0.764218	0.651549	0.499335	1.7351	0.045749	1.04528	0.0841268	0.625197	1.14	1.17717	1.00612	0.965317	1.62732	1.19252	0.99139	1.05041	0.888926		0.733134
RSX-0DH	4	2	5	17	22	0.381365	0.375265	3.13381	1.36747	1.16042	0.382089	1.3922	0.719352	0.941092	2.51279	0.478684	2.5357	2.18607	2.87563	1.97785	1.38117	7.47943	1.57854	1.2643	6.67811	6.98072	7.89957	6.13704	2.85903	7.58797	7.89001	1.70501	8.97812		3.24424
RSX-QIDH	4	4	6	14	20	0.447725	0.260658	2.89143	1.0889	0.307424	0.0721493	0.953482	0.589448	1.3745	2.5236	0.809465	2.28901	1.61178	2.17288	1.30339	0.977479	6.24354	1.14935	1.40724	5.43119	5.7059	6.39253	5.35341	2.25691	6.1622	6.02043	1.21928	7.08664		2.6465
wB97M-2	13	10	4	1	5	0.519202	0.912682	0.91592	0.335379	0.724793	0.615399	0.128859	0.0363517	0.881627	0.96688	1.14257	0.615403	1.02261	0.0414468	1.66214	0.486432	0.287581	0.518753	0.719408	0.341661	0.398666	0.0485282	0.504125	1.43262	0.444459	0.124605	1.45324	0.306087		0.628122
wB97X-2(TQZ)	21	6	1	0	1	0.410266	0.00850276	0.114527	0.376167	0.143932	0.368411	0.0238768	0.0017382	0.0032254	0.0567395	0.500941	0.275223	0.911851	0.421279	1.19822	0.370029	0.509859	0.395761	0.0740919	0.249768	0.23079	0.506191	0.492487	0.911595	0.199743	0.305642	0.908941	0.619679		0.378196
wB97X-2-D3BJ	20	6	2	0	2	0.515565	0.0549714	0.315728	0.295029	0.230811	0.374782	0.131071	0.0510513	0.773119	0.271256	0.526663	0.073196	0.809126	0.206312	1.29545	0.216946	0.0653106	0.266257	0.0463361	0.225437	0.285156	0.0728089	0.0348131	1.08402	0.251927	0.829692	0.922547	0.0514435		0.367029
SOS0-PBE0-2	4	5	3	16	19	0.932455	1.1779	2.60467	0.603205	0.593928	0.0598357	0.759362	0.686629	1.76985	2.17126	1.17839	1.87839	0.112472	1.83912	3.63212	0.169675	2.56302	0.261961	1.2212	1.85748	1.97124	2.04399	2.10563	4.02129	3.12207	2.35063	2.40184	3.4804		1.69893
HF-3C	0	2	2	24	26	21.8222	14.9131	30.173	2.0407	12.5884	20.9249	2.33686	0.971703	26.135	33.0613	15.2139	15.8549	0.680745	20.2302	18.8298	1.16189	27.8382	1.40631	16.2491	6.34411	9.47034	10.0966	30.16	18.6804	18.687	24.5202	19.6473	29.7684		16.0645
PBEh-3C	2	9	2	15	17	2.21755	3.02368	2.01843	0.835939	3.30784	3.12634	1.52345	0.956995	3.9004	3.05152	4.42442	0.93185	1.33086	3.49865	4.83015	0.573036	0.44396	1.99517	1.58718	0.658338	0.892339	0.573562	0.730436	4.85055	0.717539	0.38468	4.01975	1.39022		2.0641
B97-3C	4	0	1	23	24	4.11449	4.11435	4.61471	1.37892	3.4651	3.99289	0.449349	0.103479	4.79822	5.41816	5.33635	3.46546	2.70683	4.74037	5.53781	0.415712	5.60315	0.314324	3.44302	5.95062	6.43088	5.10603	6.02249	4.6465	6.23138	6.48798	4.81553	5.63518		4.11926
R2SCAN-3C	1	1	2	24	26	4.73057	3.33542	3.28553	1.68849	2.68092	2.77095	0.807353	0.345574	3.54727	4.10489	4.17716	1.77062	3.31435	2.81744	3.86753	1.1717	2.69005	1.16485	1.91049	2.92504	3.33681	2.3454	3.61594	2.41452	3.02046	2.84209	3.83542	2.64303		2.75571

## Sheet: Deviations
DEVIATIONS
	1A-1B	2B-2A	2C-2A	2D-2A	3B-3A	3C-3A	3D-3A	3E-3A	3F-3A	3G-3A	3H-3A	4B - 4A	4C-4A	4D-4A	4E - 4A	5B - 5A	5C - 5A	5D - 5A	5E - 5A	5F - 5A	5G - 5A	5H - 5A	5I - 5A	5J - 5A	5K- 5A	5L - 5A	5M - 5A	5N - 5A		Mean Deviation
SVWN5	0.299734	-1.6828	1.60945	-2.62891	-1.95356	-1.17526	-1.894	-0.937918	-0.247006	0.621743	-0.690069	1.10481	-4.10366	3.95478	3.53325	-1.10701	3.15269	-1.40689	-0.241337	1.88912	1.9839	2.71519	1.27823	5.36048	4.66562	4.71668	2.42661	7.42929		1.02404
Xalpha	0.503751	-2.39032	0.322439	-2.51483	-2.39598	-1.21748	-1.73718	-0.74936	-1.21595	-0.509469	-1.91936	0.0873774	-4.12769	3.75997	2.36253	-1.01615	1.32377	-1.33602	-1.02184	-0.161443	-0.152173	0.421773	-0.572095	3.87633	2.55583	3.12544	1.56561	5.08831		0.0698492
BLYP	3.67941	-4.73877	-7.36781	-0.860882	-3.39244	-2.50314	0.64096	0.921516	-6.16641	-7.7593	-6.25561	-5.92339	-2.84174	-2.97998	-6.36851	0.138095	-11.1497	0.240072	-5.21926	-10.6152	-11.2545	-10.5029	-11.3521	-6.31499	-11.2953	-10.26	-4.97898	-10.5396		-5.53645
HCTH/407	1.91804	-3.40046	-1.17817	-1.45741	-3.12992	-0.916194	0.142666	0.679291	-2.39505	-1.61049	-5.209	-1.72023	-3.38359	1.21034	-3.87425	-0.0871369	-1.39493	-0.0810365	-2.1119	-5.94114	-5.96156	-4.3217	-2.18471	-3.81435	-3.58192	-1.81903	-1.99432	-1.07324		-2.09612
N12	2.74581	-1.66166	-1.75075	-1.35584	-1.33848	-1.74691	0.0784865	0.413687	-1.55704	-2.28184	-1.57669	-1.44673	-3.14281	-0.857499	-1.39617	-0.310615	-1.47029	-0.270246	-1.34978	-1.237	-1.2066	0.359845	-2.12478	-0.711447	0.118256	-0.823474	-0.36635	0.135357		-0.93327
N12-D3	2.88805	-1.48246	-1.82656	-1.1305	-1.2236	-2.45212	-0.215267	0.0745294	-1.52514	-2.49882	-1.17796	-0.967246	-2.7041	-1.57608	-0.873441	-0.700871	-1.29052	-0.611886	-0.998379	-0.665181	-0.646874	0.865186	-1.8675	-0.696488	0.621326	-0.687167	-0.635401	0.415922		-0.842448
PBE	1.78451	-2.14333	-1.41382	-1.45484	-1.73027	-1.18251	-0.0962472	0.333909	-1.77105	-1.9612	-2.29717	-1.27831	-3.22496	0.854147	-0.891086	-0.197398	-1.81177	-0.257515	-1.46385	-2.69825	-2.85513	-1.86326	-2.47095	-0.113136	-1.11156	-0.942458	-0.166067	0.444615		-1.1421
PBE-D3BJ	1.87988	-2.05783	-1.32362	-1.4293	-1.71233	-1.69294	-0.310652	0.0349314	-1.7218	-1.94718	-2.08922	-1.17259	-2.99382	0.383529	-0.576913	-0.330927	-1.85817	-0.387992	-1.48824	-2.49461	-2.67618	-1.72689	-2.4718	0.257909	-1.00944	-1.11529	-0.256135	0.55039		-1.13347
PBE-D4	1.8326	-2.1166	-1.38078	-1.44587	-1.75975	-1.60944	-0.304972	0.0542185	-1.7981	-1.98181	-2.21683	-1.20152	-3.00896	0.517256	-0.646512	-0.277638	-1.83327	-0.345938	-1.48602	-2.55151	-2.74511	-1.78779	-2.49494	0.146352	-1.03674	-1.0769	-0.20223	0.51124		-1.1517
PBE-NL	1.67599	-1.68697	-0.8239	-1.43367	-1.35524	-1.42007	-0.352571	0.00519249	-1.22022	-1.36547	-1.48067	-0.483195	-2.99798	0.545581	-0.00125768	-0.352692	-0.525467	-0.439787	-0.788739	-1.17504	-1.30299	-0.397434	-1.2144	0.961642	0.480259	0.206038	0.2964	2.02492		-0.522205
RPBE	2.3692	-2.56345	-2.6709	-0.969932	-1.82965	-1.07153	0.644396	0.93822	-2.47903	-2.97359	-3.11015	-2.31382	-2.95613	0.0212068	-2.56525	0.196621	-3.60941	0.224975	-1.97611	-4.50979	-4.76795	-3.65766	-3.87007	-2.29443	-3.22614	-2.73043	-0.883133	-2.11037		-1.95515
revPBE	2.26205	-2.46579	-2.38167	-1.06689	-1.80286	-1.03169	0.534375	0.865952	-2.31423	-2.74343	-2.92642	-2.07899	-3.0425	0.374485	-2.17536	0.139318	-3.19744	0.159834	-1.83069	-4.07684	-4.30839	-3.20365	-3.52892	-1.80687	-2.72351	-2.29146	-0.603038	-1.49097		-1.74127
rPW86PBE	2.9969	-3.63893	-4.82828	-1.07195	-2.78062	-2.13919	0.298852	0.570134	-4.38635	-5.37504	-5.37411	-3.86765	-2.86364	-1.74257	-5.10266	-0.0586217	-7.55566	0.0289202	-3.77422	-8.51371	-8.94846	-7.98349	-7.80785	-4.84608	-8.30472	-7.66103	-4.27545	-6.91527		-4.14003
XLYP	3.90843	-4.96972	-8.01762	-0.756326	-3.5179	-2.68735	0.74784	0.9788	-6.61064	-8.37851	-6.66029	-6.41627	-2.73604	-3.62005	-7.06376	0.180937	-12.1614	0.302455	-5.60439	-11.4937	-12.1868	-11.4478	-12.2747	-7.10986	-12.4348	-11.348	-5.61183	-11.8276		-6.02918
B97M-D3BJ	3.28995	4.776	4.08428	1.93069	4.42294	4.10031	1.47848	0.997889	5.28184	5.27902	6.77442	3.81802	2.77383	3.16454	6.05221	1.20331	4.71341	1.13708	4.59261	6.58072	6.94388	5.90713	5.83808	6.15849	6.67823	5.96299	6.29735	6.04702		4.51017
B97M-D4	3.13166	4.92348	4.27033	1.90035	4.43032	3.63156	1.33594	0.816596	5.3532	5.34132	7.11247	3.78915	2.91815	2.56179	6.38556	1.09442	4.66196	1.0643	4.32219	6.87456	7.2273	6.13039	5.79901	6.59165	6.86303	5.72868	6.31138	6.20952		4.52787
B97M-V	2.92196	4.51421	3.72808	1.8947	4.01694	3.24974	1.30301	0.775134	4.7704	4.71132	6.44779	3.08873	2.98563	2.35319	5.84643	1.11988	3.33778	1.12815	3.58212	5.60682	5.88012	4.81945	4.5095	5.91164	5.39811	4.35673	5.78191	4.73564		3.88483
M06L	2.65513	-2.41052	-1.0576	-2.01989	-4.45594	-2.40667	-7.8309	-0.736497	3.66638	5.06781	10.6647	-0.0880487	-3.23129	2.31263	-3.63507	-1.00469	0.605567	-0.891686	-1.50023	-4.54759	-4.34462	-3.44773	-0.423442	-5.37136	-2.00875	-2.51132	-4.13528	-1.0144		-1.2179
M11L	4.52018	-8.8354	-5.68002	-1.19169	-7.57971	-4.03895	-1.92547	-0.440166	-8.12029	-6.57092	-7.13742	-5.67308	-2.95454	0.740548	-4.23493	-1.38048	-6.17737	-1.23455	-5.62378	-6.10839	-7.03807	-6.53463	-7.67764	-4.68394	-7.63628	-3.27832	-4.15173	-4.65414		-4.47504
MN12L	2.49579	-4.80405	-3.51716	-1.74966	-3.73014	-2.37775	-1.49777	-0.726909	-4.62338	-4.47147	-4.37677	-3.43542	-3.09676	0.821465	-2.73225	-1.28427	-4.14345	-1.24611	-3.45741	-4.62977	-5.06058	-4.46553	-5.19312	-3.62652	-5.0419	-3.07417	-3.13064	-2.72761		-3.03226
MN15L	0.976199	-2.898	-0.941497	-1.85918	-1.90991	-1.0251	-1.00694	-0.581632	-1.8593	-1.44973	-2.7961	-1.18955	-2.91075	0.582573	-2.14735	-0.997024	0.700372	-1.10317	-1.08119	-2.14539	-2.33985	-1.62592	-0.0936863	-3.29511	-0.635492	0.853457	-2.24683	0.915633		-1.21823
PKZB	1.5118	-1.2141	-0.818709	-1.1341	-0.599742	-0.824982	0.237503	0.398119	-0.682186	-1.06505	-1.91749	-0.108575	-2.65275	0.17567	-1.56942	-0.212281	0.498295	-0.148806	0.0112928	-1.92224	-2.00479	-1.12421	0.280975	-1.99274	0.535941	0.207529	-0.567241	1.26375		-0.551377
PKZB-D3(0)	1.70087	-1.12233	-0.900734	-0.863429	-0.351299	-1.36088	0.0597704	0.166271	-0.549988	-1.10449	-1.39652	0.423567	-2.24294	-0.476177	-1.04005	-0.541986	0.802039	-0.437689	0.509528	-1.13042	-1.2304	-0.461183	0.653336	1.38314	1.20999	0.579462	-0.693069	1.68575		0.240352
revTPSS	1.23618	1.66511	0.570465	-0.764424	2.2169	-0.0425408	1.48414	0.776946	1.90212	0.679058	1.55143	1.58471	-2.14161	-2.57498	-0.726268	0.159409	1.55031	0.2206	1.64899	0.252079	0.354192	1.24136	2.55358	-0.684306	2.27747	-0.331971	0.199858	2.97898		0.708493
revTPSS-D3BJ	1.33396	1.80472	0.657505	-0.731148	2.24698	-0.752671	1.1017	0.29418	1.91869	0.620808	2.10883	1.63462	-1.79201	-3.46177	-0.074124	-0.0289989	1.27646	0.0189098	1.52236	0.67284	0.720413	1.47153	2.31223	0.183195	2.39132	-0.628706	0.172483	3.19868		0.721178
revTPSS-D4	1.27585	1.74445	0.599903	-0.750405	2.2049	-0.617691	1.13136	0.343671	1.84943	0.593717	1.97102	1.5971	-1.83476	-3.28855	-0.172602	0.035926	1.3107	0.0689362	1.52936	0.603606	0.641366	1.40489	2.29829	0.0410489	2.36167	-0.569663	0.233093	3.15556		0.705792
revTPSS-NL	1.06338	2.34888	1.38971	-0.74002	2.75815	-0.448138	1.01736	0.216973	2.64997	1.44805	3.00497	2.58891	-1.77417	-3.32521	0.767009	-0.0910296	3.07065	-0.0767214	2.45582	2.49454	2.61233	3.29667	4.0196	1.22523	4.42928	1.11137	0.890731	5.22255		1.5581
RSCAN	1.96631	-2.76562	-2.06563	-2.2467	-2.69369	-2.6126	-1.34057	-0.880295	-3.19926	-3.2986	-4.45184	-1.46516	-3.45854	0.0730462	-2.60536	-1.21683	-2.14863	-1.25972	-2.18118	-3.80613	-4.00992	-2.98755	-3.32353	-1.68207	-3.28101	-3.29389	-2.74732	-1.83795		-2.31501
R2SCAN	2.09475	-2.62897	-2.15156	-2.06626	-2.42431	-2.55224	-1.08371	-0.697343	-3.05064	-3.25022	-4.13907	-1.37425	-3.29236	-0.320986	-2.66389	-1.15287	-2.10351	-1.14227	-1.93353	-3.51095	-3.7681	-2.76874	-3.04486	-1.7317	-3.22055	-3.3811	-2.65071	-1.72397		-2.20478
SCAN	1.74181	-2.10251	-2.17345	-1.77427	-1.82851	-2.16298	-0.831054	-0.446411	-2.51286	-3.06298	-2.32909	-1.63103	-2.94402	-1.93331	-2.00963	-0.978491	-2.181	-0.951826	-1.75314	-2.14827	-2.28038	-1.55058	-2.99326	-1.34231	-1.64839	-1.89875	-1.87398	-0.620596		-1.72219
TPSS	2.11328	-0.501207	-1.43332	-0.878344	0.193274	-0.870645	1.03491	0.773428	-0.648135	-1.64793	-0.524894	-0.818488	-2.48596	-2.03174	-1.72634	0.149803	-2.20669	0.203782	-0.618555	-3.01331	-3.12786	-2.36965	-1.75625	-1.63331	-1.82682	-3.15387	-0.609161	-0.333406		-1.06241
tHCTH	2.67111	-3.38654	-2.82203	-1.04932	-2.72429	-1.36256	0.449159	0.804524	-3.19391	-3.23932	-4.39409	-2.56758	-2.96176	-0.558557	-3.76354	0.0296572	-4.15839	0.0989146	-2.60126	-6.08097	-6.36244	-5.0652	-4.52535	-3.33733	-5.29474	-4.12942	-2.20218	-2.78862		-2.66129
APFD	1.44986	-1.51894	-0.334408	-1.12632	-1.329	-1.07056	-0.27805	0.109383	-1.01806	-0.839138	-1.12167	-0.308848	-2.63062	-0.153127	-0.800339	-0.691892	0.317523	-0.782456	-0.663822	0.00430191	-0.0412196	0.874493	-0.220194	-0.578669	0.862807	0.960627	-0.481532	2.09673		-0.332612
B1B95	0.64827	-0.682351	0.523606	-1.33395	-0.69195	-0.329681	-0.163306	0.137786	-0.135569	0.113036	-1.0469	0.42607	-2.6743	1.51563	-0.633469	-0.534078	1.61282	-0.617985	0.00155639	-0.0519563	0.118009	0.820745	1.11348	-0.713237	1.58708	1.34551	-0.0790866	2.93279		0.114592
B3LYP	2.89752	-4.19125	-5.7455	-0.932358	-3.2702	-2.20562	0.14005	0.525069	-5.30186	-6.1937	-5.428	-4.78913	-2.54301	-2.84435	-5.81001	-0.314264	-8.1577	-0.251338	-4.45533	-7.72672	-8.18326	-7.41313	-8.66344	-5.7518	-8.73461	-7.57862	-4.71578	-7.95419		-4.48545
B97	2.45207	-2.68358	-3.95764	-0.838953	-1.94761	-1.62202	0.276779	0.581054	-3.37313	-4.3719	-2.87782	-3.1019	-2.4507	-1.66963	-3.14195	-0.194503	-4.72659	-0.165513	-2.52333	-3.45361	-3.73892	-2.81335	-5.1902	-3.02104	-3.63032	-3.31075	-1.93406	-3.99113		-2.40787
B98	2.63939	-2.94845	-4.83251	-0.818484	-2.09692	-1.9425	0.182173	0.480069	-4.01596	-5.29984	-2.99226	-3.69978	-2.36555	-2.3685	-3.39658	-0.274086	-5.9444	-0.249621	-2.98455	-3.77664	-4.14157	-3.35638	-6.44843	-3.20913	-4.51745	-4.23849	-2.36949	-5.1738		-2.86285
BB1K	1.62671	-1.44728	-1.23245	-1.39333	-0.953721	-0.788919	0.316268	0.56193	-1.11833	-1.64608	-2.08389	-0.771362	-3.25561	1.67601	-0.914648	-0.0621168	-1.64528	-0.0943868	-0.843428	-3.34298	-3.38724	-2.6215	-1.88888	-0.881415	-1.06531	-1.4479	-0.156542	0.438082		-1.01513
BHandHLYP	2.73983	-4.43706	-5.42736	-0.691847	-3.69442	-2.3526	-0.224366	0.239941	-5.57722	-5.91336	-5.35561	-4.72242	-2.10622	-4.10054	-6.62253	-0.799508	-6.60604	-0.767351	-4.50138	-5.56935	-5.98608	-5.15452	-7.35222	-6.61603	-7.80509	-6.13304	-5.64328	-7.16345		-4.22654
CAMB3LYP	2.09084	-3.76603	-4.19477	-1.00219	-3.37088	-2.11654	-0.527735	0.0857217	-4.47984	-4.75053	-4.75884	-3.26168	-2.37869	-1.35312	-4.18699	-0.838563	-4.7033	-0.826298	-3.56493	-4.57101	-4.86126	-4.10807	-5.56797	-4.2269	-5.2943	-3.99684	-3.74792	-4.49477		-3.17048
HSE06	1.3081	-1.94604	-0.647332	-1.34945	-1.83003	-1.03063	-0.428239	0.0451569	-1.54502	-1.1876	-2.19023	-0.82042	-2.74454	0.219933	-1.59806	-0.612964	-0.136694	-0.68329	-1.24529	-1.05847	-1.09897	-0.103563	-0.983641	-0.991199	-0.311532	0.138194	-0.996743	1.13813		-0.810373
LC-wHPBE	0.361263	-0.848072	1.9635	-1.05752	-1.81333	-0.40107	-1.93993	-0.907208	1.18557	3.21018	0.159773	3.73862	-2.3874	6.17327	3.91891	-1.17237	6.164	-1.22558	0.96029	4.62978	4.88477	6.09549	5.1307	4.43983	10.2728	6.62959	3.27346	7.55639		2.46413
LC-PBE	-0.782272	-0.599488	4.04653	-1.77659	-1.59411	-0.679607	-0.916602	-0.161355	0.223002	1.33846	-0.898812	2.2942	-2.87826	4.06742	1.4859	-1.78207	9.87936	-2.01415	1.75882	8.07163	8.52019	9.58205	8.03263	1.47563	6.26907	10.8333	1.57935	12.1376		2.76828
MN12SX	1.86187	-3.30496	-2.07381	-0.687404	-2.62706	-1.26897	-0.666669	0.00561747	-2.81996	-2.49438	-2.56826	-2.08943	-2.26348	1.43496	-1.61207	-0.912026	-2.01067	-0.791557	-1.95982	-2.67033	-2.85642	-2.12833	-2.64194	-2.49595	-2.44397	-0.700577	-1.36553	-0.628544		-1.59927
MPW1B95	0.53461	-0.622234	0.692571	-1.35679	-0.688575	-0.39345	-0.305663	0.000964483	-0.0615104	0.268122	-0.920101	0.554545	-2.60756	1.31342	-0.548925	-0.641324	1.96262	-0.747137	0.052605	0.347852	0.533779	1.20486	1.39042	-0.574358	1.90121	1.64788	-0.163626	1.7996		0.16335
MPW1PW91	1.44237	-1.92503	-0.959692	-1.24894	-1.75883	-1.04297	-0.272811	0.172227	-1.68564	-1.48674	-1.99979	-0.993232	-2.66921	0.0451904	-1.56864	-0.535222	-0.4898	-0.577745	-1.25902	-0.85884	-0.922559	0.0609247	-1.24774	-0.962859	-0.365224	-0.0066812	-0.762538	0.896175		-0.820817
MPWB1K	0.305597	-0.481332	1.24667	-1.29578	-0.723162	-0.306978	-0.501224	-0.15401	0.152824	0.796674	-0.590236	0.931724	-2.40131	1.1443	-0.509281	-0.837336	3.22026	-0.990389	0.303845	1.76859	2.01555	2.70863	2.53186	-0.545505	2.93349	2.82463	-0.196215	5.70421		0.680575
N12SX	2.01146	-1.4198	-0.48887	-1.2251	-1.39229	-1.50443	-0.325791	0.113244	-1.22873	-1.07298	-0.969862	-0.559774	-2.73486	-0.480111	-0.630332	-0.633318	0.324706	-0.655964	-0.862357	0.920225	0.93871	2.19453	-0.473887	-0.255022	1.35065	0.7828	0.0927671	2.57377		-0.200379
O3LYP	1.14183	-2.18037	-0.203991	-1.74969	-2.10563	-0.876506	-0.499592	0.102956	-1.31599	-0.755158	-2.12349	-0.693442	-3.30544	1.34496	-0.668602	-0.518415	0.586947	-0.633788	-1.14364	-0.905475	-0.863357	0.267914	-0.52009	0.211879	0.726864	1.36204	0.232345	2.4809		-0.450144
PBE0	1.09767	-1.62523	-0.128385	-1.35624	-1.58423	-0.84739	-0.42906	0.0521273	-1.09222	-0.652372	-1.56106	-0.38344	-2.72287	0.602077	-0.85531	-0.59899	0.790229	-0.68098	-0.810592	0.0518496	0.0524029	1.03549	-0.0635911	-0.193759	0.948404	1.27682	-0.218217	2.32828		-0.270307
SOGGA11X	1.03536	-1.73721	-0.497751	-0.826329	-1.59515	-0.542197	-0.0856702	0.295062	-1.35336	-0.817982	-1.72826	-0.954088	-2.11892	-0.722378	-2.43776	-0.504843	0.270832	-0.553776	-1.19687	-0.445284	-0.478255	0.460048	-0.240312	-2.53695	-0.243661	0.672311	-1.58465	0.547432		-0.71145
wB97X	1.50163	-2.1887	-0.915562	-0.773968	-2.55261	-1.66158	-0.798915	-0.128533	-2.03568	-1.58241	-3.45877	-0.255786	-2.03516	0.660626	-2.26948	-1.08698	1.05009	-1.01597	-1.28851	-0.60388	-0.556228	0.725064	0.208869	-2.91354	0.258749	1.13596	-2.28969	0.695612		-0.863405
wB97X-D3BJ	1.73187	-2.08973	-1.32186	-0.540856	-2.26265	-2.22081	-0.658051	-0.206924	-2.16085	-1.90679	-2.3851	-0.73163	-1.5081	-0.685801	-1.54619	-0.954967	-0.0423825	-0.862442	-1.58949	-0.133781	-0.290882	0.61209	-0.569214	-1.79745	-0.156987	0.163456	-1.60694	0.599927		-0.897233
wB97X-D4	1.50748	-2.19539	-0.922302	-0.773828	-2.56458	-1.70336	-0.81478	-0.152224	-2.04973	-1.59545	-3.46893	-0.267502	-2.01933	0.62719	-2.22669	-1.09115	1.01504	-1.02436	-1.31055	-0.628287	-0.585368	0.693671	0.173778	-2.91107	0.22813	1.09342	-2.30535	0.663415		-0.878861
wB97X-V	1.40041	-1.75398	-0.866162	-0.520314	-1.83574	-1.50982	-0.529561	-0.0429057	-1.59092	-1.27412	-1.90728	0.00838688	-1.67257	-0.084121	-1.19923	-0.898529	1.39176	-0.874293	-0.651985	1.02207	0.94846	1.85346	0.819083	-1.37273	1.278	1.75767	-1.03934	2.0473		-0.253465
wB97M-D3BJ	1.50449	-1.82434	-2.34945	-0.566372	-1.82999	-1.9346	-0.578912	-0.146926	-2.41571	-2.88227	-2.98408	-1.26844	-1.72489	0.0251376	-2.14398	-0.980953	-1.77017	-0.961919	-1.7507	-1.51795	-1.61773	-0.979	-2.26152	-2.48015	-1.41875	-1.29644	-2.33263	-1.70876		-1.50704
wB97M-D4	1.43885	-1.95953	-2.49868	-0.571754	-1.92316	-1.75831	-0.553378	-0.0893588	-2.58351	-2.97996	-3.25846	-1.31282	-1.76347	0.32345	-2.30384	-0.884971	-1.73032	-0.889693	-1.69796	-1.66754	-1.77013	-1.10879	-2.29468	-2.75781	-1.48011	-1.17354	-2.24074	-1.80367		-1.54621
wB97M-V	1.25103	-1.56453	-1.97178	-0.562569	-1.55248	-1.52987	-0.604269	-0.144977	-2.05695	-2.38798	-2.59341	-0.58243	-1.72787	0.404256	-1.68374	-0.930609	-0.419902	-0.957854	-0.98073	-0.348441	-0.387837	0.220483	-1.04309	-1.99137	-0.00696397	0.135602	-1.71124	-0.311394		-0.930033
X3LYP	2.80595	-4.17015	-5.64784	-0.949587	-3.2743	-2.2217	0.0486007	0.445764	-5.26039	-6.09257	-5.35662	-4.72796	-2.51281	-2.92524	-5.73344	-0.380282	-7.95597	-0.335282	-4.43895	-7.50454	-7.9547	-7.22102	-8.51527	-5.64404	-8.54311	-7.36851	-4.74543	-7.76954		-4.42675
BMK	1.97084	0.341331	-1.51226	-0.767903	0.590668	-1.57615	0.0829889	0.173976	-0.119973	-2.01579	0.0394993	0.0313821	-2.10001	0.261866	-0.544041	-0.647871	1.73488	-0.616039	0.924802	3.01424	3.30067	4.67823	1.09672	-1.58558	4.50074	2.38798	-0.0456177	0.514544		0.504075
M05	2.98725	-0.0441692	0.903015	-0.848274	-0.741615	-2.21236	-0.0597007	0.411606	0.770844	0.545412	-4.78368	3.15512	-2.54209	2.79212	-3.88675	-0.662167	6.49409	-0.542477	1.62002	1.04568	1.44318	3.32714	5.9699	-4.8734	4.25904	2.0842	-2.65866	3.47759		0.622531
M06	3.17238	-1.92556	-2.54701	-1.0682	-1.97302	-3.34198	-1.10774	-0.409978	-2.38517	-3.35054	-5.15369	0.0356781	-2.20907	0.948525	-4.09615	-1.0523	-0.0672442	-0.922314	-1.27963	-2.41121	-2.4743	-1.78072	-0.862359	-5.36173	-1.35659	-2.83101	-4.67433	-0.692148		-1.82776
M062X	0.814629	0.44239	0.766727	-0.427708	-0.000968248	-0.396115	-0.178342	0.0286785	0.576919	0.506091	-1.77093	2.06798	-1.82009	3.14782	-1.17296	-0.975622	2.72297	-0.882472	1.01534	-0.363473	-0.0839443	0.782195	2.50001	-1.14164	1.05669	0.211326	-1.2916	2.00255		0.290587
M08HX	1.84298	-0.973499	-0.709515	-0.610699	-1.40129	-1.47389	-0.864525	-0.297031	-1.42241	-1.38243	-2.63968	0.833244	-2.065	3.00234	-0.638405	-1.23216	1.55171	-1.16749	0.0690357	-0.487896	-0.471823	0.103361	0.877594	-0.581398	0.467316	-0.289251	-1.15827	1.3944		-0.34731
MN15	0.312141	-0.945289	-0.251826	-1.02907	-0.718488	-0.492034	-0.46441	-0.21793	-0.534452	-0.5786	-0.73518	0.223439	-2.05296	1.56404	-0.305865	-0.769932	0.644649	-0.886608	-0.28842	-0.630465	-0.625973	-0.270001	0.298109	-1.1051	0.861073	1.12733	-0.790481	2.77199		-0.210369
MN15-D3(BJ)	0.312157	-0.945314	-0.251853	-1.02907	-0.718517	-0.492068	-0.464412	-0.217932	-0.534487	-0.578635	-0.735216	0.220873	-2.05517	1.56182	-0.30811	-0.769576	0.644863	-0.889382	-0.288821	-0.629981	-0.626173	-0.269803	0.298427	-1.10533	0.860166	1.12722	-0.790202	2.77206		-0.210369
PW6B95	1.09104	-1.18805	-0.863246	-1.20379	-1.00513	-0.831731	-0.0974812	0.126207	-1.13725	-1.27621	-1.87556	-0.599103	-2.49568	0.113149	-1.94753	-0.53123	-0.584027	-0.586194	-0.867821	-1.81644	-1.76067	-1.13187	-0.978641	-2.12545	-0.792539	-0.983551	-1.48245	0.281101		-0.948221
revPBE0	1.48669	-1.89038	-0.876269	-1.04287	-1.64405	-0.735743	0.0584266	0.469172	-1.50885	-1.25117	-2.02161	-0.988111	-2.59025	0.252254	-1.79962	-0.333831	-0.246068	-0.357419	-1.07843	-0.957638	-1.01757	0.0539742	-0.848101	-1.44051	-0.241117	0.300531	-0.519127	0.910836		-0.709173
revTPSS0	0.890115	0.898769	0.737412	-0.704794	1.17535	-0.0722434	0.799924	0.468868	1.20782	0.739992	0.970271	1.31959	-1.88572	-2.32403	-1.1398	-0.263089	2.42997	-0.247669	1.18491	1.50156	1.64664	2.48024	2.85801	-1.08844	2.59349	1.04309	-0.326354	3.35497		0.723174
revTPSSh	1.12703	1.2954	0.403987	-0.708851	1.77062	-0.0824956	1.23053	0.664903	1.48009	0.492724	-0.0867454	-0.0315683	-1.98665	-2.67193	-1.07913	2.91792e-06	1.50877	0.0505461	1.3238	0.373646	0.477679	1.30771	2.31067	-1.14387	1.94674	-0.20955	-0.250608	2.62424		0.433489
SCAN0	1.0214	1.56398	0.812444	1.63081	1.65156	1.46756	0.941171	0.535913	1.65459	1.58517	1.92476	0.615026	2.61912	1.1057	1.8445	1.14651	0.199931	1.22307	1.0704	0.306395	0.281321	0.516294	0.772294	1.27561	0.0468684	0.0550773	1.68517	0.893776		1.08737
TPSS0	1.4306	-0.559604	-0.293218	-0.878283	-0.275621	-0.642382	0.396304	0.409432	-0.416704	-0.583346	-0.266676	-0.08233	-2.21763	-1.52237	-1.21518	-0.31192	0.342486	-0.316798	-0.2719	-0.315308	-0.293392	0.504091	0.291094	-1.34366	0.303169	-0.366439	-0.533781	1.71013		-0.261401
TPSS0-D3BJ	1.55553	-0.455525	-0.183273	-0.847611	-0.263355	-1.30964	0.110828	0.0195517	-0.369479	-0.574768	0.765916	0.890236	-1.90953	-2.12999	-0.313029	-0.482694	0.276329	-0.476776	-0.316264	-0.0597061	-0.0705065	0.670171	0.273383	-0.868949	0.428483	-0.604443	-0.645764	1.83796		-0.180461
TPSS0-D4	1.48579	-0.537219	-0.265029	-0.868056	-0.316822	-1.13514	0.156305	0.0858566	-0.458181	-0.617318	1.17451	1.31496	-1.96807	-1.90524	-1.12597	-0.401655	0.300536	-0.418042	-0.302284	-0.170453	-0.191167	0.567808	0.245934	-1.05964	0.36565	-0.533963	-0.58245	1.76468		-0.192667
TPSS0-NL	1.26096	0.0739016	0.528467	-0.855366	0.24933	-0.902931	0.0736747	-0.0030639	0.35961	0.250507	-0.343499	-0.163449	-1.92927	-1.90867	-1.48665	-0.514973	2.03913	-0.548927	0.618178	1.67421	1.7389	2.4196	1.95288	0.0841607	1.51819	1.13572	0.0788598	3.79969		0.39997
TPSSh	1.79247	-0.476556	-0.923154	-0.881284	0.0403301	-0.743474	0.775069	0.624793	-0.50054	-1.15927	-0.410203	-0.517438	-2.35971	-1.80903	-1.60404	-0.0356599	-1.1384	-0.00392268	-0.450387	-1.91378	-1.96479	-1.20164	-0.885924	-1.50832	-0.937028	-2.01335	-0.556506	0.51265		-0.723182
tHCTHhyb	2.48871	-2.60346	-3.73469	-0.940856	-1.92094	-1.77861	0.129511	0.424256	-3.18559	-4.23657	-2.96575	-2.7725	-2.49362	-1.75012	-3.0553	-0.295428	-4.41261	-0.240676	-2.36218	-3.53831	-3.8248	-2.85512	-4.8917	-2.65943	-3.58045	-3.399	-2.15411	-3.70235		-2.36828
B2CN-PLYP	-1.43354	2.83492	3.01355	-0.424196	2.45166	1.38363	0.141228	-0.261476	3.42988	3.4473	1.70324	2.78814	-0.000728066	2.74869	0.454972	0.232604	4.33452	0.0343575	2.6828	2.28584	2.68984	2.34499	4.64509	1.2782	3.75658	2.01659	0.89139	3.01322		1.8744
B2GP-PLYP	1.13461	-1.4658	-2.1575	-0.574974	-1.04021	-0.882909	0.0725667	0.106218	-1.85961	-2.25081	-2.38907	-1.87601	-1.20106	-1.2325	-3.52524	-0.208259	-2.97223	-0.221041	-1.71956	-3.14127	-3.28917	-2.89994	-3.14569	-3.15927	-3.73078	-3.53488	-2.84366	-3.59289		-1.91432
B2PLYP	1.57749	-2.06181	-3.11103	-0.612819	-1.46275	-1.18047	0.182386	0.256319	-2.64305	-3.25296	-3.08283	-2.67087	-1.42445	-1.63241	-4.07234	-0.129402	-4.60302	-0.103885	-2.41531	-4.6193	-4.86416	-4.40295	-4.7685	-3.79075	-5.27274	-4.90006	-3.28913	-5.01918		-2.62036
DOD-SCAN	2.31819	-3.52379	-5.1703	0.593618	-2.54125	-0.401082	-0.0679737	0.774295	-4.61575	-0.511341	-3.89351	-4.18334	-0.514421	-3.92881	-6.51834	-0.289052	-5.42565	-0.178972	-3.35767	-3.99149	-4.37857	-1.03693	-5.38751	-7.14922	-6.66188	-4.71761	-4.9785	-6.84125		-3.09208
DSD-PBEB95	-0.208732	0.550929	1.19684	-0.56174	0.520622	0.400284	0.0703153	0.0381611	1.07971	1.25619	0.391782	0.983151	-0.976443	1.1109	-0.4307	-0.164788	2.17478	-0.216644	0.786862	0.946183	1.14106	1.35458	2.15488	-0.342165	1.90203	1.45382	-0.0139923	2.3657		0.67727
DSD-PBEP86	0.125887	0.00527395	0.349769	-0.558821	0.0800729	0.00972502	-0.0260519	-0.0323781	0.303795	0.368135	-0.28185	0.207525	-0.919168	0.457739	-1.08021	-0.156494	0.807906	-0.216563	0.113822	0.114646	0.175079	0.443291	0.678782	-0.580918	0.470318	0.22295	-0.622729	0.728685		0.0424364
DSD-PBEP86-D3(BJ)	0.370956	0.697891	-0.17495	-0.408506	-0.0957397	-0.313181	-0.00751741	-0.0427235	-0.0987565	-0.160906	-0.339826	-0.207982	-0.694952	-0.226346	-1.22687	-0.132502	-0.111995	-0.140934	-0.289125	-0.421126	-0.423911	-0.222074	-0.14189	-0.86029	-0.285482	-0.532928	-0.876525	-0.0215347		-0.263919
DSD-PBEP86(D4)	0.321779	0.87351	-0.241242	-0.411035	-0.109951	-0.0969903	0.0840501	0.0726563	-0.13332	-0.187775	-0.47098	-0.255372	-0.791702	0.000119457	-1.38933	-0.0737264	-0.129489	-0.0978062	-0.2564	-0.571625	-0.565736	-0.339317	-0.167616	-1.06052	-0.388261	-0.473459	-0.869396	-0.121871		-0.280386
DSD-PBEP86-NL	0.292346	-0.174385	-0.108643	-0.401997	-0.00981458	-0.109192	0.0415138	0.0186935	0.00164115	-0.0446537	-0.279339	-0.0553659	-0.748234	-0.0473414	-1.19988	-0.103507	0.203003	-0.131148	-0.0705682	-0.201074	-0.183561	0.0248443	0.156367	-0.831615	0.00360619	-0.169379	-0.752344	0.267401		-0.164737
LS1DH-PBE	-0.289157	0.396304	2.01606	-0.909551	0.212519	0.183672	-0.397434	-0.283465	1.30493	1.95305	0.47628	1.4919	-1.31685	1.46633	0.0589923	-0.516239	3.94661	-0.645196	1.07995	2.91625	3.13541	3.65359	3.44859	0.963092	3.575	3.21275	0.382538	4.26062		1.27773
MPW2PLYP	1.63665	-2.25524	-3.21963	-0.637939	-1.67936	-1.34049	0.0468436	0.161565	-2.87855	-3.40645	-3.2207	-2.7764	-1.45774	-1.99863	-4.25821	-0.270667	-4.53818	-0.261688	-2.57626	-4.42166	-4.67227	-4.19259	-4.80949	-3.95903	-5.28158	-4.79302	-3.56745	-5.00253		-2.7011
PBE0-2	-0.490086	0.719597	2.22916	-0.865814	0.52527	0.369415	-0.350057	-0.300847	1.65176	2.25212	0.696223	1.7227	-1.15514	1.68766	0.169748	-0.453488	4.15971	-0.58803	1.33905	2.97881	3.22991	3.64092	3.74283	1.1014	3.73827	3.21231	0.475974	4.28974		1.4189
PBE0DH	1.2393	-2.10825	-0.60992	-1.00514	-2.07694	-1.0135	-0.508509	0.00672314	-1.81397	-1.10541	-2.02671	-0.835139	-2.29168	-0.60089	-2.19013	-0.868828	0.962062	-0.947542	-1.18296	0.835838	0.807578	1.82046	0.0168083	-1.74771	0.515468	1.39574	-1.38806	1.65793		-0.537978
PBEQIDH	1.97787	-3.31188	-2.4674	-0.564459	-2.97579	-1.5313	-0.369583	0.169661	-3.5248	-2.90891	-3.41378	-2.34868	-2.00243	-2.35019	-4.41012	-0.99929	-1.04141	-1.03751	-2.38786	-0.391396	-0.588902	0.471386	-1.9712	-4.30349	-2.06313	-0.417528	-3.30471	-1.18855		-1.75912
PWPB95	0.49548	-0.368417	-0.194533	-0.6298	-0.169258	-0.134475	0.143543	0.225446	-0.165136	-0.27436	-0.39439	-0.105894	-1.38771	0.0878923	-1.119	-0.185419	0.0492209	-0.181501	-0.2039	-0.637914	-0.570805	-0.295176	-0.0023262	-1.24891	0.09937	-0.137351	-0.675658	0.918181		-0.252243
PWPB95-D3BJ	0.529372	-0.384539	-0.212468	-0.627248	-0.208763	-0.324292	0.0653973	0.113196	-0.209986	-0.319819	-0.403915	-0.118089	-1.30201	-0.0608954	-1.0588	-0.215114	-0.0507039	-0.217795	-0.26061	-0.681714	-0.625846	-0.361204	-0.100041	-1.19049	0.0255421	-0.273114	-0.730557	0.847288		-0.298472
PWPB95-D4	0.527082	-0.288549	-0.0946677	-0.625612	-0.131648	-0.393228	0.0200331	0.0660987	-0.0932841	-0.204972	-0.221175	-0.0252261	-1.27008	-0.174899	-0.898002	-0.254363	0.12984	-0.247248	-0.206143	-0.394351	-0.349636	-0.104076	0.0889229	-0.980118	0.290995	-0.151951	-0.658269	1.09616		-0.198156
PWPB95-NL	0.465597	-0.218467	-0.0117556	-0.616935	-0.0462037	-0.242094	0.0450841	0.0944149	0.00747844	-0.0894455	-0.128333	0.165854	-1.28961	-0.046377	-0.821526	-0.24093	0.470628	-0.248478	0.0285834	-0.134679	-0.0589981	0.186045	0.40944	-0.896552	0.619933	0.2269	-0.534365	1.43349		-0.0525462
revDOD-PBEP86	0.542836	-0.68503	-1.02316	-0.108511	-0.365705	0.00522846	0.333499	0.369206	-0.701675	-0.878976	-0.445492	-0.867207	-0.572115	-0.688909	-1.72946	0.0767961	-1.2094	0.136953	-0.70112	-1.14058	-1.18561	-1.03913	-1.08975	-1.69205	-1.27706	-0.986412	-1.0234	-0.932585		-0.674243
revDSD-PBEP86	0.508342	-0.609413	-0.889953	-0.192294	-0.31059	-0.022119	0.286514	0.309789	-0.599194	-0.765871	-0.543954	-0.764218	-0.651549	-0.499335	-1.7351	0.045749	-1.04528	0.0841268	-0.625197	-1.14	-1.17717	-1.00612	-0.965317	-1.62732	-1.19252	-0.99139	-1.05041	-0.888926		-0.644954
RSX-0DH	-0.381365	-0.375265	3.13381	-1.36747	-1.16042	-0.382089	-1.3922	-0.719352	0.941092	2.51279	0.478684	2.5357	-2.18607	2.87563	1.97785	-1.38117	7.47943	-1.57854	1.2643	6.67811	6.98072	7.89957	6.13704	2.85903	7.58797	7.89001	1.70501	8.97812		2.46396
RSX-QIDH	-0.447725	0.260658	2.89143	-1.0889	-0.307424	-0.0721493	-0.953482	-0.589448	1.3745	2.5236	0.809465	2.28901	-1.61178	2.17288	1.30339	-0.977479	6.24354	-1.14935	1.40724	5.43119	5.7059	6.39253	5.35341	2.25691	6.1622	6.02043	1.21928	7.08664		2.13237
wB97M-2	0.519202	-0.912682	-0.91592	-0.335379	-0.724793	-0.615399	-0.128859	-0.0363517	-0.881627	-0.96688	-1.14257	-0.615403	-1.02261	-0.0414468	-1.66214	-0.486432	-0.287581	-0.518753	-0.719408	-0.341661	-0.398666	-0.0485282	0.504125	-1.43262	-0.444459	-0.124605	-1.45324	-0.306087		-0.555028
wB97X-2(TQZ)	0.410266	-0.00850276	-0.114527	-0.376167	0.143932	-0.368411	0.0238768	0.0017382	0.0032254	-0.0567395	-0.500941	0.275223	-0.911851	0.421279	-1.19822	-0.370029	0.509859	-0.395761	0.0740919	0.249768	0.23079	0.506191	-0.492487	-0.911595	0.199743	-0.305642	-0.908941	0.619679		-0.116077
wB97X-2-D3BJ	0.515565	0.0549714	-0.315728	-0.295029	0.230811	-0.374782	0.131071	0.0510513	-0.773119	-0.271256	-0.526663	0.073196	-0.809126	0.206312	-1.29545	-0.216946	-0.0653106	-0.266257	-0.0463361	-0.225437	-0.285156	-0.0728089	0.0348131	-1.08402	-0.251927	-0.829692	-0.922547	-0.0514435		-0.27433
SOS0-PBE0-2	0.932455	-1.1779	-2.60467	0.603205	-0.593928	0.0598357	0.759362	0.686629	-1.76985	-2.17126	-1.17839	-1.87839	0.112472	-1.83912	-3.63212	0.169675	-2.56302	0.261961	-1.2212	-1.85748	-1.97124	-2.04399	-2.10563	-4.02129	-3.12207	-2.35063	-2.40184	-3.4804		-1.44282
HF-3C	21.8222	-14.9131	-30.173	2.0407	-12.5884	-20.9249	-2.33686	-0.971703	-26.135	-33.0613	-15.2139	-15.8549	0.680745	-20.2302	-18.8298	-1.16189	-27.8382	1.40631	-16.2491	-6.34411	-9.47034	-10.0966	-30.16	-18.6804	-18.687	-24.5202	-19.6473	-29.7684		-14.2109
PBEh-3C	2.21755	-3.02368	-2.01843	-0.835939	-3.30784	-3.12634	-1.52345	-0.956995	-3.9004	-3.05152	-4.42442	-0.93185	-1.33086	-3.49865	-4.83015	-0.573036	0.44396	1.99517	-1.58718	-0.658338	-0.892339	0.573562	-0.730436	-4.85055	-0.717539	-0.38468	-4.01975	-1.39022		-1.69051
B97-3C	4.11449	-4.11435	-4.61471	-1.37892	-3.4651	-3.99289	-0.449349	-0.103479	-4.79822	-5.41816	-5.33635	-3.46546	-2.70683	-4.74037	-5.53781	-0.415712	-5.60315	-0.314324	-3.44302	-5.95062	-6.43088	-5.10603	-6.02249	-4.6465	-6.23138	-6.48798	-4.81553	-5.63518		-3.82537
R2SCAN-3C	-4.73057	-3.33542	-3.28553	-1.68849	-2.68092	-2.77095	-0.807353	-0.345574	-3.54727	-4.10489	-4.17716	-1.77062	-3.31435	-2.81744	-3.86753	-1.1717	-2.69005	-1.16485	-1.91049	-2.92504	-3.33681	-2.3454	-3.61594	-2.41452	-3.02046	-2.84209	-3.83542	-2.64303		-2.75571

## Sheet: Basis Sets_TPSS0
Energies (kcal/mol) for TPSS0 using various basis sets
	1A	1B	2A	2B	2C	2D	3A	3B	3C	3D	3E	3F	3G	3H	4A	4B	4C	4D	4E	5A	5B	5C	5D	5E	5F	5G	5H	5I	5J	5K	5L	5M	5N
6-31G(d)	-49482.9	-49478.8	-74173.3	-74166.9	-74164.6	-74152.8	-98858.6	-98847.8	-98845.8	-98845.3	-98844.7	-98838.9	-98838	-98825.6	-98081.8	-98073.3	-98069.9	-98058.1	-98041.8	-122761	-122755	-122756	-122753	-122749	-122749	-122749	-122749	-122747	-122729	-122735	-122730	-122720	-122714
6-31+G(d,p)	-49488.4	-49483.5	-74180	-74173.3	-74172.3	-74159.5	-98867	-98856	-98854.8	-98853.6	-98853.1	-98847.8	-98847.5	-98834.7	-98088.7	-98080.1	-98076.6	-98066.3	-98050.2	-122770	-122764	-122764	-122762	-122758	-122757	-122757	-122757	-122755	-122740	-122743	-122739	-122730	-122724
6311+G(2d,p)	-49499.1	-49493.8	-74195.6	-74188.4	-74186.9	-74174.9	-98887.4	-98876.1	-98875.5	-98874	-98873.5	-98867.4	-98867.1	-98855.1	-98109.1	-98099.5	-98096.9	-98088.3	-98071.9	-122796	-122790	-122788	-122787	-122782	-122782	-122781	-122781	-122779	-122766	-122768	-122764	-122757	-122750
6311++G(3df,3pd)	-49501.6	-49496	-74198.9	-74192.4	-74191.1	-74178.1	-98891.9	-98881.1	-98880.2	-98878.5	-98877.8	-98872.7	-98872.4	-98859.9	-98113.2	-98104.6	-98101	-98093.3	-98076.4	-122801	-122795	-122794	-122792	-122788	-122787	-122787	-122787	-122785	-122772	-122774	-122770	-122762	-122756
cc-pVDZ	-49487.4	-49482.2	-74178.8	-74170.6	-74170	-74157.8	-98865.1	-98853.1	-98853.3	-98851.5	-98851.2	-98845	-98845.1	-98832.9	-98088.4	-98078.6	-98076	-98066.8	-98051.2	-122770	-122763	-122762	-122761	-122756	-122756	-122756	-122755	-122754	-122740	-122742	-122739	-122731	-122724
cc-pVTZ	-49502.7	-49497.2	-74200.7	-74193.8	-74192.4	-74179.7	-98894	-98882.9	-98882.2	-98880.5	-98880	-98874.4	-98874.2	-98861.7	-98115.5	-98106.4	-98103.2	-98095.5	-98078.6	-122804	-122798	-122796	-122795	-122791	-122789	-122789	-122789	-122787	-122774	-122776	-122772	-122765	-122758
cc-pVQZ	-49506	-49500.5	-74205.6	-74198.9	-74197.5	-74184.7	-98900.6	-98889.6	-98888.8	-98887.1	-98886.6	-98881.2	-98880.9	-98868.3	-98121.9	-98112.9	-98109.6	-98102	-98085	-122812	-122806	-122805	-122803	-122799	-122798	-122798	-122797	-122796	-122782	-122784	-122780	-122773	-122766
aug-cc-pVDZ	-49489.7	-49484.2	-74181.7	-74174.9	-74174.1	-74161.2	-98869.2	-98858.3	-98857.6	-98855.9	-98855.4	-98850.3	-98850.1	-98838	-98092	-98083.2	-98079.9	-98070.2	-98055.5	-122774	-122768	-122768	-122766	-122762	-122762	-122762	-122762	-122759	-122746	-122748	-122744	-122736	-122730
aug-cc-pVTZ	-49502.9	-49497.4	-74201	-74194.2	-74192.8	-74180.1	-98894.4	-98883.4	-98882.6	-98881	-98880.4	-98874.9	-98874.7	-98862.2	-98115.9	-98106.9	-98103.7	-98096	-98079.1	-122804	-122798	-122797	-122795	-122791	-122790	-122790	-122790	-122788	-122775	-122776	-122773	-122765	-122759
aug-cc-pVQZ	-49506.2	-49500.6	-74205.7	-74199.1	-74197.7	-74184.9	-98900.8	-98889.9	-98889.1	-98887.4	-98886.8	-98881.5	-98881.2	-98868.6	-98122.1	-98113.2	-98109.9	-98102.2	-98085.3	-122812	-122806	-122805	-122803	-122799	-122798	-122798	-122798	-122796	-122783	-122784	-122780	-122773	-122767
def2-mSVP	-49480.5	-49476.1	-74170.2	-74163.6	-74161.6	-74149.8	-98854.8	-98844.1	-98842.1	-98841.6	-98841	-98835.4	-98834.6	-98822	-98078.2	-98072.3	-98066.3	-98054.4	-98070.1	-122757	-122751	-122752	-122749	-122745	-122745	-122745	-122745	-122743	-122726	-122731	-122726	-122716	-122711
def2-SVP	-49448.6	-49443.2	-74121.3	-74112.5	-74112.8	-74100.3	-98789.4	-98776.6	-98777.5	-98775.4	-98775.2	-98769.2	-98769.4	-98756.2	-98011.1	-98003.6	-97998.8	-97990.6	-98001.4	-122674	-122668	-122667	-122666	-122661	-122659	-122659	-122659	-122658	-122644	-122646	-122644	-122635	-122629
def2-TZVP	-49502.8	-49497.3	-74200.9	-74194.1	-74192.7	-74180	-98894.4	-98883.3	-98882.6	-98881	-98880.4	-98874.9	-98874.6	-98862.1	-98116.4	-98109	-98104.1	-98096.3	-98107.4	-122805	-122799	-122798	-122796	-122792	-122791	-122791	-122790	-122788	-122775	-122777	-122773	-122766	-122759
def2-TZVPPD	-49503.8	-49498.3	-74202.4	-74195.6	-74194.2	-74181.5	-98896.4	-98885.3	-98884.6	-98882.9	-98882.4	-98876.9	-98876.6	-98864	-98117.9	-98110.5	-98105.7	-98098	-98108.9	-122807	-122801	-122800	-122798	-122794	-122792	-122792	-122792	-122790	-122777	-122779	-122775	-122768	-122761
ma-def2-TZVP	-49502.8	-49497.3	-74200.9	-74194.1	-74192.7	-74180	-98894.4	-98883.4	-98882.6	-98881	-98880.5	-98874.9	-98874.6	-98862.2	-98116.5	-98109	-98104.2	-98096.3	-98107.4	-122805	-122799	-122798	-122796	-122792	-122791	-122791	-122790	-122789	-122775	-122777	-122773	-122766	-122759
ma-def2-QZVPP	-49506.6	-49501	-74206.3	-74199.6	-74198.2	-74185.5	98901.6	-98890.6	-98889.8	-98888.2	-98887.6	-98882.2	-98881.9	-98869.3	-98122.9	-98113.9	-98110.6	-98103	-98113.9	-122813	-122807	-122806	-122804	-122800	-122799	-122799	-122798	-122797	-122784	-122785	-122781	-122774	-122768
pcSeg-0	-49341	-49344.1	-73972.1	-73957.7	-73947.7	-73954.1	-98595.6	-98578.2	-98574.9	-98580.1	-98580.2	-98563.1	-98558.7	-98555.7	-97823.5	-97791.3	-97813.6	-97790	-97805.1	-122441	-122434	-122412	-122432	-122418	-122415	-122414	-122410	-122402	-122404	-122395	-122388	-122392	-122376
pcSeg-1	-49472.2	-49467.4	-74156.8	-74147	-74146.5	-74136.1	-98836.5	-98823.1	-98824.1	-98822.4	-98822.4	-98814.9	-98815	-98801.9	-98058.9	-98048.5	-98047	-98036.7	-98048.3	-122734	-122727	-122724	-122725	-122719	-122716	-122716	-122715	-122715	-122701	-122702	-122701	-122692	-122685
aug-pcSeg-1	-49475.1	-49470.1	-74160.6	-74152.3	-74151.5	-74140	-98841.3	-98829.4	-98829.3	-98827.8	-98827.5	-98821.2	-98820.9	-98808.7	-98062.8	-98055.6	-98051	-98042	-98053.9	-122739	-122733	-122732	-122730	-122726	-122725	-122725	-122725	-122723	-122709	-122711	-122708	-122699	-122693
pcSeg-2	-49502.2	-49496.8	-74200	-74193.3	-74191.9	-74179.1	-98893.2	-98882.2	-98881.3	-98879.7	-98879.1	-98873.8	-98873.4	-98860.9	-98114.5	-98107.2	-98102.1	-98094.6	-98105.5	-122803	-122796	-122795	-122794	-122790	-122788	-122788	-122788	-122786	-122773	-122775	-122771	-122764	-122757
aug-pcSeg-2	-49502.5	-49497	-74200.4	-74193.7	-74192.3	-74179.5	-98893.8	-98882.8	-98882	-98880.3	-98879.8	-98874.4	-98874.1	-98861.5	-98115.1	-98107.7	-98102.8	-98095.3	-98106.1	-122803	-122797	-122796	-122795	-122790	-122789	-122789	-122789	-122787	-122774	-122775	-122772	-122764	-122758
pcSeg-3	-49506.6	-49501	-74206.3	-74199.7	-74198.3	-74185.5	-98901.6	-98890.6	-98889.8	-98888.2	-98887.6	-98882.2	-98881.9	-98869.3	-98122.8	-98115.5	-98110.5	-98102.9	-98113.8	-122813	-122807	-122806	-122804	-122800	-122799	-122799	-122798	-122797	-122783	-122785	-122781	-122774	-122767

## Sheet: Basis Sets_PWPB95NL
Energies (kcal/mol) for PWPB95-NL using various basis sets
	1A	1B	2A	2B	2C	2D	3A	3B	3C	3D	3E	3F	3G	3H	4A	4B	4C	4D	4E	5A	5B	5C	5D	5E	5F	5G	5H	5I	5J	5K	5L	5M	5N
ccpVTZ	-49440.1	-49433.6	-74107.2	-74100.8	-74099.3	-74086.5	-98771.1	-98760.4	-98759.7	-98757.3	-98756.8	-98752.1	-98751.9	-98739.2	-98001.4	-97992.7	-97990.1	-97982.9	-97965.1	-122661	-122655	-122654	-122652	-122648	-122647	-122647	-122646	-122644	-122632	-122633	-122629	-122622	-122615
ccpVQZ	-49446.8	-49440.3	-74117.3	-74111	-74109.6	-74096.7	-98784.8	-98774.1	-98773.4	-98771	-98770.5	-98765.8	-98765.6	-98752.7	-98014.5	-98005.8	-98003.1	-97996.1	-97978.3	-122677	-122671	-122670	-122668	-122664	-122663	-122663	-122662	-122661	-122648	-122650	-122646	-122638	-122631
augccpVTZ	-49441	-49434.5	-74108.6	-74102.3	-74100.8	-74088	-98773.2	-98762.5	-98761.8	-98759.4	-98758.8	-98754.1	-98753.9	-98741.2	-98003.2	-97994.5	-97991.9	-97984.8	-97967.1	-122663	-122657	-122656	-122654	-122650	-122649	-122649	-122648	-122647	-122634	-122636	-122632	-122624	-122617
augccpVQZ	-49447.2	-49440.7	-74118	-74111.6	-74110.2	-74097.4	-98785.7	-98775	-98774.3	-98771.9	-98771.4	-98766.7	-98766.5	-98753.6	-98015.3	-98006.6	-98004	-97996.9	-97979.1	-122678	-122672	-122671	-122670	-122666	-122664	-122664	-122663	-122662	-122649	-122651	-122647	-122639	-122633
def2-TZVPP	-49441.2	-49434.8	-74109	-74102.6	-74101.2	-74088.4	-98773.7	-98762.9	-98762.2	-98759.8	-98759.3	-98754.6	-98754.5	-98741.7	-98003.9	-97995.3	-97992.6	-97985.4	-97967.6	-122664	-122658	-122657	-122655	-122651	-122650	-122650	-122649	-122648	-122635	-122636	-122633	-122625	-122618
ma-def2-QZVPP	-49447.5	-49441	-74118.3	-74111.9	-74110.4	-74097.6	-98786	-98775.3	-98774.6	-98772.2	-98771.7	-98767	-98766.8	-98753.9	-98015.7	-98007	-98004.3	-97997.3	-97979.4	-122679	-122673	-122672	-122670	-122666	-122665	-122665	-122664	-122662	-122650	-122651	-122647	-122640	-122633
aug-pcSeg-2	-49440.4	-49433.9	-74107.7	-74101.3	-74099.9	-74087.2	-98772.1	-98761.3	-98760.7	-98758.3	-98757.8	-98753.1	-98752.8	-98740	-98002.1	-97993.3	-97990.7	-97983.7	-97965.6	-122662	-122656	-122655	-122653	-122649	-122647	-122647	-122647	-122645	-122632	-122634	-122630	-122623	-122616

[truncated: 4 more sheets: 3c Composite Methods, RIMP2 and SCS-MP2, Example 1, Example 2]
